# Supplementary material for: Carbon–nitrogen bond cleavage of pyridine with two molecular substituted allenoates: access to 2-arylpyrimidin-4(3H)-one
Source: Royal Society of Chemistry journal article supplement (doi:10.1039/c8cc08946a), 2018-01-01

## **Carbon-nitrogen bond cleavage of pyridine with two molecular substituted allenoates: access to 2-arylpurimidin-4(3H)-one**

Tao Jin,<sup>†a</sup> Hongdong Yuan,<sup>†a</sup> Shikuan Su,<sup>a</sup> Xueshun Jia,<sup>\*a,b</sup> Chunju Li,<sup>a</sup> Jian Li<sup>\*a</sup> and Jianhui Fang<sup>\*a</sup>

<sup>a</sup> Department of Chemistry, Center for Supramolecular Chemistry and Catalysis, Shanghai University, 99 Shangda Road, Shanghai, 200444, P.R. China

<sup>b</sup> State Key Laboratory of Applied Organic Chemistry, Lanzhou University, Lanzhou, 730000, P. R. China.

E-mail: xsjia@mail.shu.edu.cn; lijian@shu.edu.cn; jhfang@shu.edu.cn

### **Supporting Information**

#### **Table of Contents**

|          |                                                                          |            |
|----------|--------------------------------------------------------------------------|------------|
| <b>1</b> | <b>General Information</b>                                               | <b>S2</b>  |
| <b>2</b> | <b>General Procedure</b>                                                 | <b>S2</b>  |
| <b>3</b> | <b>Characterization Data</b>                                             | <b>S3</b>  |
|          | Spectroscopic Data of All Compounds                                      | S3         |
| <b>4</b> | <b>Controlled Experiments and Mechanistic Studies</b>                    | <b>S11</b> |
| <b>5</b> | <b><sup>1</sup>H NMR and <sup>13</sup>C NMR Spectra of All Compounds</b> | <b>S16</b> |

## 1 General Information

The NMR spectra were recorded on Bruker AC – 500 spectrometer (500 MHz for  $^1\text{H}$  NMR and 125 MHz for  $^{13}\text{C}$  NMR) with  $\text{CDCl}_3$  as the solvent and TMS as internal reference.  $^1\text{H}$  NMR spectral data were reported as follows: chemical shift ( $\delta$ , ppm), multiplicity, integration, and coupling constant (Hz).  $^{13}\text{C}$  NMR spectral data were reported in terms of the chemical shift. The following abbreviations were used to indicate multiplicities: s = singlet; d = doublet; t = triplet; q = quartet; m = multiplet. Low-resolution mass spectra were obtained on a Shimadzu LCMS-2010EV spectrometer in ESI mode and reported as  $m/z$ . High-resolution mass spectra (HRMS) were recorded on a Bruker Daltonics, Inc. APEXIII 7.0 TESLA FTMS instrument. Melting points were obtained on a X-4 digital melting point apparatus without correction. Chemical yields referred to pure isolated product. Purification of products was accomplished by column chromatography packed with silica gel. Unless otherwise stated, all reagents were commercially purchased and used without further purification. All substituted allenates **1** were synthesized according to procedures reported previously.<sup>[1]</sup>

## 2 General Procedure

### 2.1 General procedure for the formation of product **3** or **4**.

Under air atmosphere, a sealable reaction tube with a Teflon-coated screw cap equipped with a magnetic stir bar was charged with substituted allenate **1** (1.5 mmol), 2-aminopyridine derivatives **2** (0.5 mmol), DABCO (22.5 mg, 0.4 equiv),  $\text{Cs}_2\text{CO}_3$  (195 mg, 1.2 equiv) in toluene (5 mL) at room temperature. Then capped it and stirred at 140 °C for 12 h. After the reaction was completed, it was cooled to room temperature and monitored by TLC. And the reaction mixture was concentrated under vacuum. The residue was purified by flash chromatography on silica gel (eluant: petroleum ether/ethyl acetate) to give the desired product **3** or **4**.

## 2.2 Representative procedure for the preparation of substituted allenolate **1**

### Synthesis of ethyl 2-benzylbuta-2,3-dienoate (**1a**)

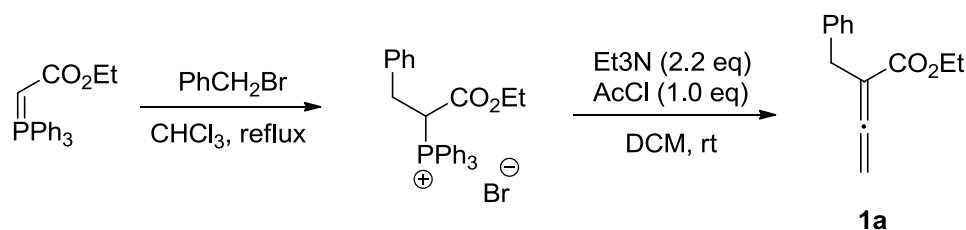

To a stirred solution of (carbethoxymethylene)triphenylphosphorane (Alfa, 98%, 10.0 g, 27.27 mmol) in chloroform (80 mL) was added 1.27 equiv. of (bromomethyl)benzene (Alfa) at room temperature. The reaction mixture was refluxed until (carbethoxymethylene)triphenylphosphorane (monitored by TLC) was disappeared. The solvent and the excess of (bromomethyl)benzene was evaporated under reduced pressure. To the resulting phosphonium salt were added dichloromethane (100 mL) and 2.2 equiv. of triethylamine (8.4 mL). After stirred for about 1 hr, 1.0 equiv. of acetyl chloride (1.96 mL) was added dropwise over 30 min. Then the reaction mixture was allowed to be stirred overnight. The resulting mixture was poured into a Buchner funnel that was packed with silica gel and was washed with dichloromethane for several times. The combined filtrate was carefully concentrated and the residue was subjected to a flash column chromatography (20:1 petroleum ether/ethyl acetate eluent) to provide allenolate **1a**.

### Reference

[1] a) G. S. Creech, O. Kwon, *Org. Lett.* **2008**, *10*, 429-432; b) X.-F. Zhu, J. Lan, O. Kwon, *J. Am. Chem. Soc.* **2003**, *125*, 4716-4717.

### 3 Characterization Data

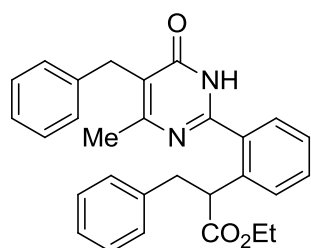

**(3a):** 194 mg, 86% yield. Yellow solid. m.p.: 160-161 °C.  $^1\text{H}$  NMR (500 MHz,  $\text{CDCl}_3$ ):  $\delta$  (ppm) = 12.47 (s, 1H), 7.64 (d,  $J$  = 8.0 Hz, 1H), 7.57-7.56 (m, 1H), 7.51 (t,  $J$  = 7.5 Hz, 1H), 7.35 (t,  $J$  = 7.5 Hz, 1H), 7.26-7.20 (m, 5H), 7.05-6.05 (m, 5H), 4.82-4.80 (m, 1H), 4.09 (q,  $J$  = 7.0 Hz, 1H), 4.01 (q,  $J$  = 7.0 Hz, 1H), 3.91 (d,  $J$  = 14.5 Hz, 1H), 3.84 (d,  $J$  = 14.5 Hz, 1H), 3.42 (dd,  $J$  = 13.5, 8.0 Hz, 1H), 3.10 (dd,  $J$  = 13.5, 7.0 Hz, 1H), 2.45 (s, 3H), 1.08 (t,  $J$  = 7.0 Hz, 3H).  $^{13}\text{C}$  NMR (125 MHz,  $\text{CDCl}_3$ ):  $\delta$  (ppm) = 173.3, 164.2, 161.1, 154.6, 139.3, 138.8, 137.8, 132.7, 130.8, 129.4, 128.8, 128.5, 128.3, 128.2, 128.1, 127.2, 126.1, 126.0, 122.0, 60.8, 48.3, 39.7, 31.0, 22.0, 13.8. HRMS (ESI): calcd for  $\text{C}_{29}\text{H}_{29}\text{N}_2\text{O}_3$   $[\text{M}+\text{H}]^+$  453.2173, Found: 453.2171.

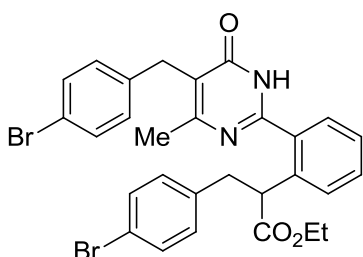

**(3b):** 253 mg, 83% yield. Yellow solid. m.p.: 136-138 °C.  $^1\text{H}$  NMR (500 MHz,  $\text{CDCl}_3$ ):  $\delta$  (ppm) = 12.91 (s, 1H), 7.62-7.49 (m, 3H), 7.35-7.33 (m, 3H), 7.12 (d,  $J$  = 8.0 Hz, 2H), 7.09 (d,  $J$  = 8.0 Hz, 2H), 6.80-6.78 (m, 2H), 4.80 (t,  $J$  = 7.0 Hz, 1H), 4.05 (q,  $J$  = 7.0 Hz, 2H), 3.82 (d,  $J$  = 14.5 Hz, 1H), 3.74 (d,  $J$  = 14.5 Hz, 1H), 3.34 (dd,  $J$  = 13.5, 8.0 Hz, 1H), 3.02 (dd,  $J$  = 13.5, 7.0 Hz, 1H), 2.42 (s, 3H), 1.09 (t,  $J$  = 7.0 Hz, 3H).  $^{13}\text{C}$  NMR (125 MHz,  $\text{CDCl}_3$ ):  $\delta$  (ppm) = 173.0, 164.3, 161.0, 154.8, 138.4, 137.7, 137.6, 132.5, 131.3, 131.1, 130.9, 130.5, 130.3, 129.7, 128.3, 127.2, 121.5, 120.0, 119.9, 61.0, 47.9, 39.0, 30.63, 22.0, 13.9. HRMS (ESI): calcd for  $\text{C}_{29}\text{H}_{27}\text{Br}_2\text{N}_2\text{O}_3$   $[\text{M}+\text{H}]^+$  611.0362, Found: 611.0369.

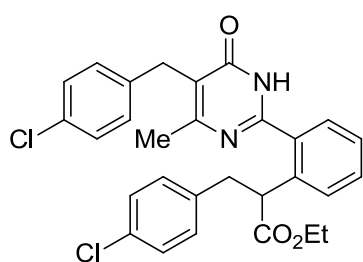

**(3c):** 203 mg, 78% yield. Yellow solid. m.p.: 150-151 °C.  $^1\text{H}$  NMR (500 MHz,  $\text{CDCl}_3$ ):  $\delta$  (ppm) = 12.70 (s, 1H), 7.59-7.57 (m, 2H), 7.52-7.49 (m, 1H), 7.37-7.34 (m, 1H), 7.20-7.16 (m, 4H), 6.94 (d,  $J$  = 8.0 Hz, 2H), 6.84 (d,  $J$  = 8.0 Hz, 2H), 4.77 (t,  $J$  = 7.5 Hz, 1H), 4.11-3.99 (m, 2H), 3.84 (d,  $J$  = 14.5 Hz, 1H), 3.76 (d,  $J$  = 14.5 Hz, 1H), 3.35 (dd,  $J$  = 13.5, 8.0 Hz, 1H), 3.03 (dd,  $J$  = 13.5, 7.0 Hz, 1H),

2.42 (s, 1H), 1.09 (t,  $J = 7.0$  Hz, 3H).  $^{13}\text{C}$  NMR (125 MHz,  $\text{CDCl}_3$ ):  $\delta$  (ppm) = 173.1, 164.3, 161.1, 154.8, 137.9, 137.6, 137.2, 132.6, 131.9, 131.9, 130.9, 130.1, 129.9, 129.6, 128.4, 128.3, 128.2, 127.2, 121.6, 61.0, 48.0, 39.0, 30.5, 22.0, 13.9. HRMS (ESI): calcd for  $\text{C}_{29}\text{H}_{27}\text{Cl}_2\text{N}_2\text{O}_3$   $[\text{M}+\text{H}]^+$  521.1393, Found: 521.1386.

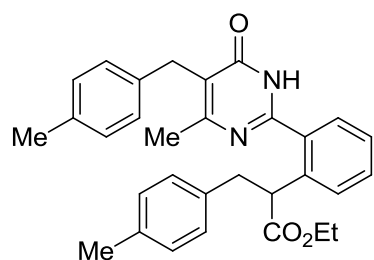

**(3d)**: 196 mg, 82% yield. Yellow solid. m.p.: 126-127 °C.  $^1\text{H}$  NMR (500 MHz,  $\text{CDCl}_3$ ):  $\delta$  (ppm) = 11.85 (s, 1H), 7.62 (d,  $J = 8.0$  Hz, 1H), 7.51-7.48 (m, 2H), 7.34 (t,  $J = 7.5$  Hz, 1H), 7.17 (d,  $J = 8.0$  Hz, 2H), 7.07 (d,  $J = 7.5$  Hz, 2H), 6.87-6.83 (m, 4H), 4.70-4.67 (m, 1H), 4.15-3.99 (m, 2H), 3.87 (d,

$J = 14.5$  Hz, 1H), 3.81 (d,  $J = 14.5$  Hz, 1H), 3.37 (dd,  $J = 13.5, 8.0$  Hz, 1H), 3.01 (dd,  $J = 13.5, 7.0$  Hz, 1H), 2.43 (s, 3H), 2.32 (s, 3H), 2.20 (s, 3H), 1.10 (t,  $J = 7.0$  Hz, 3H).  $^{13}\text{C}$  NMR (125 MHz,  $\text{CDCl}_3$ ):  $\delta$  (ppm) = 173.3, 163.8, 160.9, 154.5, 137.8, 136.3, 135.7, 135.6, 135.5, 132.9, 130.8, 129.3, 129.0, 128.9, 128.7, 128.4, 128.2, 127.2, 122.3, 60.9, 48.3, 39.2, 30.6, 22.0, 20.9, 20.9, 13.9. HRMS (ESI): calcd for  $\text{C}_{31}\text{H}_{33}\text{N}_2\text{O}_3$   $[\text{M}+\text{H}]^+$  481.2486, Found: 481.2492.

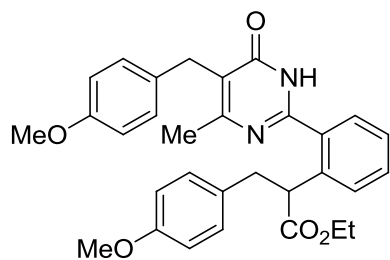

**(3e)**: 232 mg, 89% yield. Yellow oil.  $^1\text{H}$  NMR (500 MHz,  $\text{CDCl}_3$ ):  $\delta$  (ppm) = 11.43 (s, 1H), 7.60 (dd,  $J = 8.0, 1.0$  Hz, 1H), 7.51-7.48 (m, 2H), 7.36-7.33 (m, 1H), 7.19 (d,  $J = 8.5$  Hz, 2H), 6.82 (d,  $J = 8.5$  Hz, 2H), 6.79 (d,  $J = 8.5$  Hz, 2H), 6.58 (d,  $J = 8.5$  Hz, 2H), 4.62 (t,  $J = 7.5$  Hz, 1H),

4.13-4.01 (m, 2H), 3.85-3.77 (m, 5H), 3.60 (s, 3H), 3.34 (dd,  $J = 13.5, 8.0$  Hz, 1H), 2.97 (dd,  $J = 13.5, 7.0$  Hz, 1H), 2.42 (s, 3H), 1.12 (t,  $J = 7.0$  Hz, 3H).  $^{13}\text{C}$  NMR (125 MHz,  $\text{CDCl}_3$ ):  $\delta$  (ppm) = 173.3, 163.6, 163.5, 160.7, 158.0, 154.4, 137.7, 133.1, 131.4, 130.8, 130.6, 129.8, 129.5, 129.3, 128.3, 127.3, 122.5, 113.7, 113.6, 61.0, 55.2, 54.9, 48.6, 38.8, 30.2, 22.05, 13.9. HRMS (ESI): calcd for  $\text{C}_{31}\text{H}_{32}\text{N}_2\text{O}_5$   $[\text{M}+\text{H}]^+$  513.2384, Found: 513.2387.

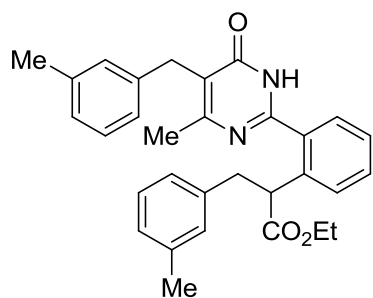

**(3f)**: 206 mg, 86% yield. Yellow oil.  $^1\text{H}$  NMR (500 MHz,  $\text{CDCl}_3$ ):  $\delta$  (ppm) = 12.7 (s, 1H), 7.68-7.64 (m, 2H), 7.53 (t,  $J = 7.5$  Hz, 1H), 7.35 (t,  $J = 7.5$  Hz, 1H), 7.19-7.04 (m, 4H), 7.00-6.85 (m, 4H), 4.90-4.87 (m, 1H), 4.18-4.00 (m, 2H), 3.89 (s, 2H), 3.44 (dd,  $J = 13.5, 8.5$  Hz, 1H), 3.12 (dd,  $J = 13.5, 6.5$  Hz, 1H), 2.49 (s, 3H), 2.33 (s, 3H), 2.21 (s, 3H), 1.10 (t,  $J = 7.0$  Hz, 3H).  $^{13}\text{C}$  NMR (125 MHz,  $\text{CDCl}_3$ ):  $\delta$  (ppm) = 173.2, 164.3, 161.1, 154.6, 139.2, 138.8, 138.0, 137.7, 137.5, 132.6, 130.6, 129.5, 129.5, 129.0, 128.2, 128.1, 127.9, 127.0, 126.7, 125.8, 125.5, 121.9, 60.7, 48.2, 39.5, 30.8, 22.0, 21.3, 21.0, 13.8. HRMS (ESI): calcd for  $\text{C}_{31}\text{H}_{33}\text{N}_2\text{O}_3$   $[\text{M}+\text{H}]^+$  481.2486, Found: 481.2497.

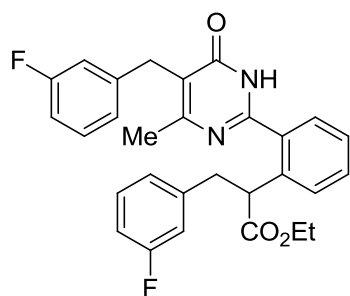

**(3g)**: 213 mg, 76% yield. Yellow oil.  $^1\text{H}$  NMR (500 MHz,  $\text{CDCl}_3$ ):  $\delta$  (ppm) = 12.40 (s, 1H), 7.58-7.55 (m, 2H), 7.51-7.48 (m, 1H), 7.36-7.33 (m, 1H), 7.21-7.17 (m, 1H), 7.01-6.94 (m, 3H), 6.90-6.87 (m, 1H), 4.75-4.72 (m, 1H), 4.14-3.98 (m, 2H), 3.88 (d,  $J = 14.5$  Hz, 1H), 3.82 (d,  $J = 15.0$  Hz, 1H), 3.41 (dd,  $J = 13.5, 8.5$  Hz, 1H), 3.08 (dd,  $J = 13.5, 7.0$  Hz, 1H), 2.42 (s, 1H), 1.08 (t,  $J = 7.0$  Hz, 3H).  $^{13}\text{C}$  NMR (125 MHz,  $\text{CDCl}_3$ ):  $\delta$  (ppm) = 173.0, 164.1, 163.8, 163.5, 161.8, 161.6, 161.4, 154.9, 141.9, 141.8, 141.5, 141.4, 137.5, 132.6, 131.0, 129.7, 129.6, 129.6, 129.6, 129.5, 129.5, 128.3, 127.5, 124.5, 124.5, 124.1, 124.1, 121.5, 115.8, 115.6, 115.5, 115.3, 113.2, 113.1, 113.0, 113.0, 61.1, 48.1, 39.1, 30.8, 30.8, 22.0, 13.8. HRMS (ESI): calcd for  $\text{C}_{29}\text{H}_{27}\text{F}_2\text{N}_2\text{O}_3$   $[\text{M}+\text{H}]^+$  489.1984, Found: 489.1920.

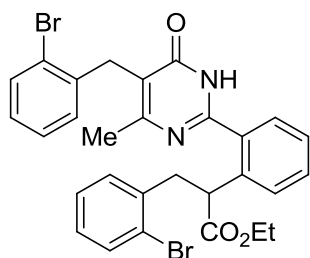

**(3h)**: 244 mg, 80% yield. Yellow solid. m.p.: 168-169 °C.  $^1\text{H}$  NMR (500 MHz,  $\text{CDCl}_3$ ):  $\delta$  (ppm) = 11.31 (s, 1H), 7.60-7.56 (m, 2H), 7.50-7.47 (m, 1H), 7.44-7.42 (m, 1H), 7.36-7.33 (m, 1H), 7.26-7.18 (m, 2H), 7.09-7.05 (m, 2H), 6.95-6.93 (m, 2H), 6.77-6.74 (m, 1H), 4.97 (t,  $J = 7.5$  Hz, 1H), 4.20-4.14 (m, 1H), 4.01 (d,  $J = 17.0$  Hz, 1H), 3.96 (d,  $J = 17.0$  Hz, 1H), 3.57 (dd,  $J = 13.5, 8.5$  Hz, 1H), 3.01 (dd,  $J = 13.5,$

7.5 Hz, 1H), 2.29 (s, 3H), 1.18 (t,  $J = 7.0$  Hz, 3H).  $^{13}\text{C}$  NMR (125 MHz,  $\text{CDCl}_3$ ):  $\delta$  (ppm) = 173.0, 163.4, 162.7, 154.7, 138.0, 137.5, 137.4, 133.0, 132.6, 132.5, 131.4, 131.1, 129.3, 128.8, 128.5, 128.2, 127.7, 127.6, 127.3, 127.2, 124.7, 124.6, 120.4, 61.3, 45.71, 40.12, 31.13, 22.13, 14.02. HRMS (ESI): calcd for  $\text{C}_{29}\text{H}_{27}\text{Br}_2\text{N}_2\text{O}_3$   $[\text{M}+\text{H}]^+$  611.0362, Found: 611.0367.

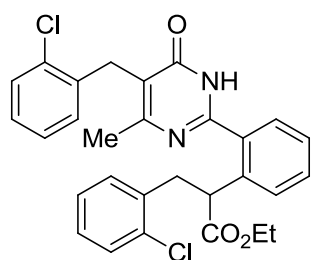

**(3i)**: 211 mg, 81% yield. Yellow solid. m.p.: 177-179 °C.  $^1\text{H}$  NMR (500 MHz,  $\text{CDCl}_3$ ):  $\delta$  (ppm) = 11.9 (s, 1H), 7.59 (d,  $J = 7.5$  Hz, 1H), 7.51-7.41 (m, 3H), 7.28-7.23 (m, 1H), 7.19-7.10 (m, 4H), 7.00 (t,  $J = 7.5$  Hz, 1H), 6.87 (t,  $J = 7.5$  Hz, 1H), 6.77 (t,  $J = 7.5$  Hz, 1H), 5.07 (t,  $J = 7.5$  Hz, 1H), 4.19-4.09 (m, 2H), 3.58 (dd,  $J = 13.5, 7.0$  Hz, 1H), 3.04 (dd,  $J = 13.5, 8.5$  Hz, 1H), 2.34 (s, 3H), 1.17 (t,  $J = 7.0$  Hz, 3H).  $^{13}\text{C}$  NMR (125 MHz,  $\text{CDCl}_3$ ):  $\delta$  (ppm) = 173.0, 162.7, 162.5, 154.4, 137.4, 136.3, 135.8, 134.1, 134.1, 133.3, 131.4, 131.1, 129.3, 129.1, 128.9, 128.3, 128.1, 127.7, 127.4, 126.7, 126.5, 120.6, 61.5, 45.6, 37.5, 28.3, 22.0, 14.0. HRMS (ESI): calcd for  $\text{C}_{29}\text{H}_{27}\text{Cl}_2\text{N}_2\text{O}_3$   $[\text{M}+\text{H}]^+$  521.1393, Found: 521.1393.

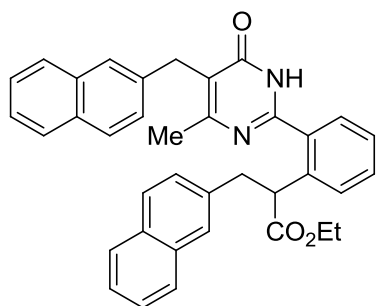

**(3j)**: 193 mg, 70% yield. Yellow solid. m.p.: 188-189 °C.  $^1\text{H}$  NMR (500 MHz,  $\text{CDCl}_3$ ):  $\delta$  (ppm) = 11.96 (s, 1H), 7.82-7.70 (m, 3H), 7.67-7.61 (m, 3H), 7.55-7.50 (m, 2H), 7.47-7.41 (m, 5H), 7.38 (s, 1H), 7.35-7.23 (m, 3H), 7.09 (dd,  $J = 8.5, 1.5$  Hz, 1H), 4.93 (t,  $J = 7.5$  Hz, 1H), 4.11-3.94 (m, 4H), 3.57 (dd,  $J = 13.5, 8.0$  Hz, 1H), 3.21 (dd,  $J = 13.5, 7.0$  Hz, 1H), 2.47 (s, 3H), 1.07 (t,  $J = 7.0$  Hz, 3H).  $^{13}\text{C}$  NMR (125 MHz,  $\text{CDCl}_3$ ):  $\delta$  (ppm) = 172.3, 163.9, 161.2, 154.7, 139.4, 139.0, 138.0, 133.0, 130.7, 129.6, 128.8, 128.5, 128.3, 128.1, 127.8, 127.2, 126.1, 126.0, 122.0, 81.4, 49.0, 39.9, 31.0, 27.7, 22.0, 14.0. HRMS (ESI): calcd for  $\text{C}_{37}\text{H}_{33}\text{N}_2\text{O}_3$   $[\text{M}+\text{H}]^+$  553.2486, Found: 553.2488.

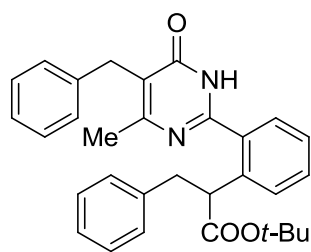

**(3k)**: 150 mg, 63% yield. Yellow solid. m.p.: 157-159 °C.  $^1\text{H}$  NMR (500 MHz,  $\text{CDCl}_3$ ):  $\delta$  (ppm) = 12.18 (s, 1H), 7.67 (d,  $J$  = 7.5 Hz, 1H), 7.56-7.50 (m, 2H), 7.36-7.32 (m, 1H), 7.28-7.20 (m, 5H), 7.09-7.06 (m, 3H), 7.03-7.01 (m, 2H), 4.62-4.59 (m, 1H), 3.93 (d,  $J$  = 14.5 Hz, 1H), 3.86 (d,  $J$  = 14.5 Hz, 1H), 3.39 (dd,  $J$  = 13.5, 8.5 Hz, 1H), 3.07 (dd,  $J$  = 13.5, 7.0 Hz, 1H), 2.44 (s, 3H), 1.30 (s, 9H).  $^{13}\text{C}$  NMR (125 MHz,  $\text{CDCl}_3$ ):  $\delta$  (ppm) = 172.3, 163.9, 161.2, 154.7, 139.4, 139.0, 138.0, 133.0, 130.7, 129.6, 128.8, 128.5, 128.3, 128.1, 127.8, 127.2, 126.1, 126.0, 122.0, 81.4, 49.0, 39.3, 31.0, 27.7, 22.0, 14.0. HRMS (ESI): calcd for  $\text{C}_{31}\text{H}_{33}\text{N}_2\text{O}_3$   $[\text{M}+\text{H}]^+$  481.2486, Found: 481.2486

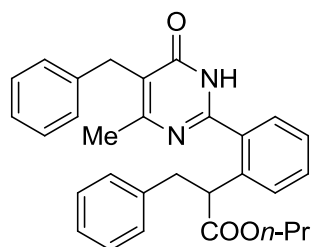

**(3l)**: 165 mg, 71% yield. Yellow solid. m.p.: 166-167 °C.  $^1\text{H}$  NMR (500 MHz,  $\text{CDCl}_3$ ):  $\delta$  (ppm) = 12.42 (s, 1H), 7.65 (dd,  $J$  = 8.0, 0.5 Hz, 1H), 7.57 (dd,  $J$  = 7.5, 1.0 Hz, 1H), 7.53-7.49 (m, 1H), 7.36-7.33 (m, 1H), 7.26-7.18 (m, 5H), 7.06-6.96 (m, 5H), 4.82 (t,  $J$  = 7.5 Hz, 1H), 4.01-3.82 (m, 4H), 3.43 (dd,  $J$  = 13.5, 8.0 Hz, 1H), 3.09 (dd,  $J$  = 13.5, 7.0 Hz, 1H), 2.45 (s, 3H), 1.51-1.44 (m, 2H), 0.72 (t,  $J$  = 7.5 Hz, 3H).  $^{13}\text{C}$  NMR (125 MHz,  $\text{CDCl}_3$ ):  $\delta$  (ppm) = 173.4, 164.2, 161.1, 154.6, 139.3, 138.8, 137.9, 132.7, 130.7, 129.4, 128.7, 128.5, 128.3, 128.2, 128.1, 127.2, 126.1, 126.0, 122.0, 66.4, 48.3, 39.7, 22.0, 21.6, 10.0. HRMS (ESI): calcd for  $\text{C}_{30}\text{H}_{31}\text{N}_2\text{O}_3$   $[\text{M}+\text{H}]^+$  467.2329, Found: 467.2331.

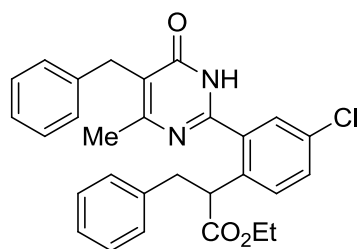

**(4a)**: 197 mg, 81% yield. Yellow solid. m.p.: 163-165 °C.  $^1\text{H}$  NMR (500 MHz,  $\text{CDCl}_3$ ):  $\delta$  (ppm) = 11.69 (s, 1H), 7.56-7.53 (m, 2H), 7.48-7.46 (m, 1H), 7.24-7.16 (m, 5H), 7.07-6.99 (m, 3H), 6.89-6.88 (m, 2H), 4.62 (t,  $J$  = 7.5 Hz, 1H), 4.14-4.01 (m, 2H), 3.94 (d,  $J$  = 14.5 Hz, 1H), 3.87 (d,  $J$  = 14.5 Hz, 1H), 3.38 (dd,  $J$  = 14.0, 7.5 Hz, 1H), 3.01 (dd,  $J$  = 14.0, 7.5 Hz, 1H), 2.41 (s, 3H), 1.19 (t,  $J$  = 7.0 Hz, 3H).  $^{13}\text{C}$  NMR (125 MHz,  $\text{CDCl}_3$ ):  $\delta$  (ppm) = 172.9, 163.5, 161.1, 153.1, 139.1, 138.2, 136.1, 134.4, 133.4, 130.9, 129.9, 129.4, 128.8, 128.5, 128.3, 126.4, 126.2, 122.8, 61.3, 48.0, 39.5, 31.0, 22.0, 13.9. HRMS (ESI): calcd for  $\text{C}_{29}\text{H}_{28}\text{ClN}_2\text{O}_3$   $[\text{M}+\text{H}]^+$  487.1783, Found: 487.1799.



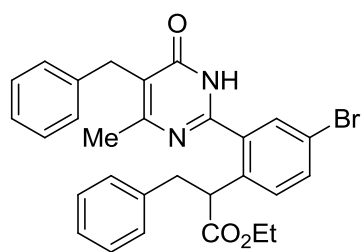

**(4b)**: 208 mg, 79% yield. Yellow solid. m.p.: 113-115 °C.  $^1\text{H}$  NMR (500 MHz,  $\text{CDCl}_3$ ):  $\delta$  (ppm) = 12.85 (s, 1H), 7.78 (d,  $J$  = 2.0 Hz, 1H), 7.64 (dd,  $J$  = 8.5, 2.0 Hz, 1H), 7.51 (d,  $J$  = 8.5 Hz, 1H), 7.25-7.16 (m, 5H), 7.03-7.00 (m, 1H), 6.97-6.94 (m, 2H), 6.91-6.89 (m, 2H), 4.79 (t,  $J$  = 7.5 Hz, 1H), 4.11-3.98 (m, 2H), 3.95 (d,  $J$  = 14.5 Hz, 1H), 3.90 (d,  $J$  = 14.5 Hz, 1H), 3.38 (dd,  $J$  = 14.0, 8.0 Hz, 1H), 3.04 (dd,  $J$  = 14.0, 7.5 Hz, 1H), 2.11 (s, 3H), 1.08 (t,  $J$  = 7.0 Hz, 3H).  $^{13}\text{C}$  NMR (125 MHz,  $\text{CDCl}_3$ ):  $\delta$  (ppm) = 173.0, 164.4, 161.1, 153.1, 139.2, 138.3, 136.9, 134.3, 133.6, 132.5, 130.1, 128.7, 128.6, 128.2, 128.2, 126.1, 126.0, 122.6, 121.0, 61.0, 47.9, 39.7, 30.9, 22.0, 13.8. HRMS (ESI): calcd for  $\text{C}_{29}\text{H}_{28}\text{BrN}_2\text{O}_3$   $[\text{M}+\text{H}]^+$  531.1278, Found: 531.1278.

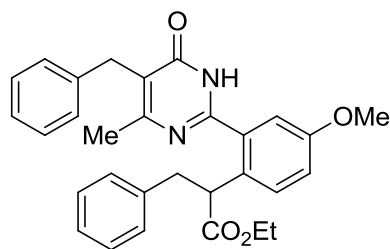

**(4c)**: 171 mg, 71% yield. Yellow oil.  $^1\text{H}$  NMR (500 MHz,  $\text{CDCl}_3$ ):  $\delta$  (ppm) = 12.54 (s, 1H), 7.56 (d,  $J$  = 8.5 Hz, 1H), 7.23-7.17 (m, 5H), 7.14-7.13 (m, 1H), 7.09-7.07 (m, 1H), 7.01-6.98 (m, 1H), 6.95-6.92 (m, 1H), 4.75 (t,  $J$  = 7.5 Hz, 1H), 4.14-3.98 (m, 1H), 3.92 (d,  $J$  = 14.5 Hz, 1H), 3.85 (d,  $J$  = 14.5 Hz, 1H), 3.38 (dd,  $J$  = 14.0, 8.0 Hz, 1H), 3.04 (dd,  $J$  = 14.0, 7.5 Hz, 1H), 3.06-3.02 (m, 1H), 2.46 (s, 3H), 1.08 (t,  $J$  = 7.0 Hz, 3H).  $^{13}\text{C}$  NMR (125 MHz,  $\text{CDCl}_3$ ):  $\delta$  (ppm) = 173.6, 161.2, 158.3, 154.5, 139.2, 138.8, 133.5, 129.6, 129.6, 129.5, 128.8, 128.5, 128.2, 128.0, 126.0, 125.9, 122.0, 117.4, 113.9, 60.8, 55.2, 47.5, 39.8, 30.9, 22.0, 13.9. HRMS (ESI): calcd for  $\text{C}_{30}\text{H}_{31}\text{N}_2\text{O}_3$   $[\text{M}+\text{H}]^+$  483.2278, Found: 483.2273.

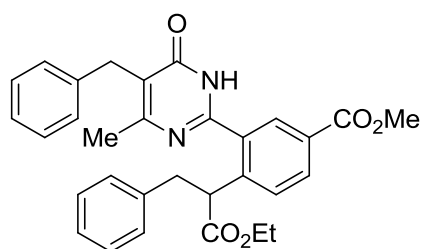

**(4d)**: 175 mg, 69% yield. Yellow oil.  $^1\text{H}$  NMR (500 MHz,  $\text{CDCl}_3$ ):  $\delta$  (ppm) = 12.40 (s, 1H), 8.25 (s, 1H), 8.16 (dd,  $J$  = 8.5, 1.5 Hz, 1H), 7.70 (d,  $J$  = 8.5 Hz, 1H), 7.21-7.15 (m, 5H), 7.04-7.01 (m, 1H), 6.97-6.94 (m, 2H), 6.88-6.87 (m, 2H), 4.84-4.81 (m, 1H), 4.14-4.00 (m, 2H), 3.87-3.79 (m, 5H), 3.38 (dd,  $J$  = 14.0, 7.5 Hz, 1H), 3.04 (dd,  $J$  = 14.0, 8.0 Hz, 1H), 2.41 (s, 3H), 1.09 (t,  $J$  = 7.0 Hz, 3H).  $^{13}\text{C}$  NMR (125 MHz,  $\text{CDCl}_3$ ):  $\delta$  (ppm) = 172.7, 165.8, 164.0, 164.0, 161.0, 153.7, 142.7,

139.2, 138.1, 133.1, 131.5, 130.7, 129.1, 128.7, 128.7, 128.4, 128.2, 128.2, 126.2, 126.1, 122.5, 61.1, 52.2, 48.5, 39.6, 30.8, 22.0, 13.9. HRMS (ESI): calcd for  $C_{31}H_{31}N_2O_5$   $[M+H]^+$  511.2227, Found: 511.2229.

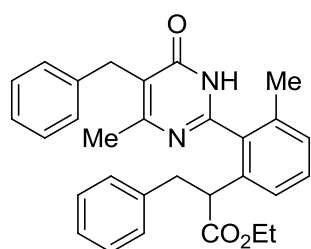

**(4e)**: 193 mg, 89% yield. Yellow solid. m.p.: 168-170 °C.  $^1H$  NMR (500 MHz,  $CDCl_3$ ):  $\delta$  (ppm) = 12.39 (s, 1H), 7.51 (d,  $J$  = 8.0 Hz, 1H), 7.43 (t,  $J$  = 7.5 Hz, 1H), 7.28-7.17 (m, 11H), 3.84-3.79 (m, 5H), 3.37 (s, 1H), 3.07 (s, 1H), 2.46 (s, 3H), 2.22 (s, 3H), 0.94-0.92 (m, 3H).  $^{13}C$  NMR (125 MHz,  $CDCl_3$ ):  $\delta$  (ppm) =

172.7, 163.7, 161.3, 139.1, 137.3, 136.3, 133.2, 130.1, 129.2, 128.7, 128.4, 128.2, 126.2, 126.0, 122.3, 60.7, 49.9, 31.0, 30.1, 21.9, 19.7, 13.6. HRMS (ESI): calcd for  $C_{30}H_{31}N_2O_3$   $[M+H]^+$  467.2329, Found: 467.2325.

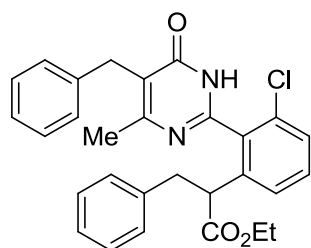

**(4f)**: 202 mg, 83% yield. Yellow solid. m.p.: 179-180 °C.  $^1H$  NMR (500 MHz,  $CDCl_3$ ):  $\delta$  (ppm) = 12.31 (s, 1H), 7.56 (dd,  $J$  = 8.0, 1.0 Hz, 1H), 7.42 (t,  $J$  = 7.5 Hz, 1H), 7.36 (dd,  $J$  = 8.0, 1.0 Hz, 1H), 7.26-7.11 (m, 8H), 6.98 (s, 2H), 3.98-3.76 (m, 5H), 3.32 (dd,  $J$  = 14.0, 9.0 Hz, 1H), 3.04 (dd,  $J$  = 14.0, 5.5 Hz, 1H),

2.41 (s, 3H), 1.0-0.97 (m, 3H).  $^{13}C$  NMR (125 MHz,  $CDCl_3$ ):  $\delta$  (ppm) = 172.2, 163.8, 161.5, 152.3, 139.8, 139.0, 138.5, 133.1, 132.5, 131.1, 128.7, 128.4, 128.4, 128.3, 128.3, 126.4, 126.0, 125.9, 123.0, 61.0, 50.0, 39.5, 30.9, 21.9, 13.7. HRMS (ESI): calcd for  $C_{29}H_{28}ClN_2O_3$   $[M+H]^+$  487.1783, Found: 487.1783.

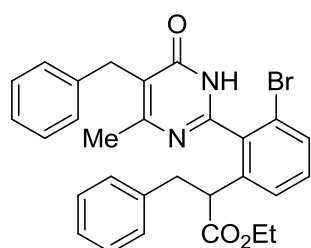

**(4g)**: 201 mg, 76% yield. Yellow solid. m.p.: 165-166 °C.  $^1H$  NMR (500 MHz,  $CDCl_3$ ):  $\delta$  (ppm) = 11.21 (s, 1H), 7.60 (d,  $J$  = 8.0 Hz, 1H), 7.53 (dd,  $J$  = 8.0, 1.0 Hz, 1H), 7.35 (t,  $J$  = 7.5 Hz, 1H), 7.27-7.13 (m, 8H), 6.95 (s, 2H), 4.00-3.75 (m, 5H), 3.32-3.28 (m, 1H), 3.05-3.02 (m, 1H), 2.39 (s, 3H), 1.01 (s, 3H).  $^{13}C$

NMR (125 MHz,  $CDCl_3$ ):  $\delta$  (ppm) = 172.2, 163.2, 161.4, 153.2, 139.9, 139.0, 138.5, 134.5, 131.8, 131.5, 128.7, 128.4, 128.4, 128.4, 126.6, 126.1, 123.3, 122.3, 61.22, 50.4, 39.7, 31.0, 21.9, 13.8. HRMS (ESI): calcd for  $C_{29}H_{28}BrN_2O_3$   $[M+H]^+$  531.1278, Found: 531.1278.

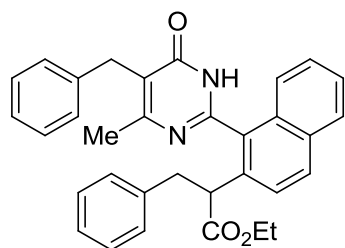

(**4h**): 163 mg, 65% yield. Yellow solid. m.p.: 183-184 °C.  $^1\text{H}$  NMR (500 MHz,  $\text{CDCl}_3$ ):  $\delta$  (ppm) = 11.28-10.03 (s, 1H), 8.00 (s, 1H), 7.89-7.87 (m, 1H), 7.79-7.71 (m, 1H), 7.25-7.12 (m, 8H), 7.01-7.00 (m, 1H), 6.80 (s, 1H), 4.13-3.78 (m, 5H), 3.54-3.38 (m, 1H), 3.15-3.12 (m, 1H), 2.44-2.41 (m, 3H), 1.14-0.97 (m, 3H).  $^{13}\text{C}$  NMR (125 MHz,  $\text{CDCl}_3$ ):  $\delta$  (ppm) = 172.7, 172.4, 163.1, 162.8, 161.3, 161.1, 154.0, 153.4, 139.0, 138.4, 135.4, 135.0, 132.4, 131.1, 130.9, 130.8, 130.6, 130.3, 130.0, 128.7, 128.4, 128.3, 128.0, 127.4, 127.2, 126.5, 126.3, 126.0, 124.8, 124.5, 123.8, 122.9, 122.8, 61.1, 61.0, 50.5, 50.4, 39.7, 38.8, 30.9, 22.0, 13.9, 13.7. HRMS (ESI): calcd for  $\text{C}_{33}\text{H}_{31}\text{N}_2\text{O}_3$   $[\text{M}+\text{H}]^+$  503.2329, Found: 503.2326.

## 4 Control Experiments and Mechanistic Studies

### 1) Experiment with $\gamma$ -substituted allenolate

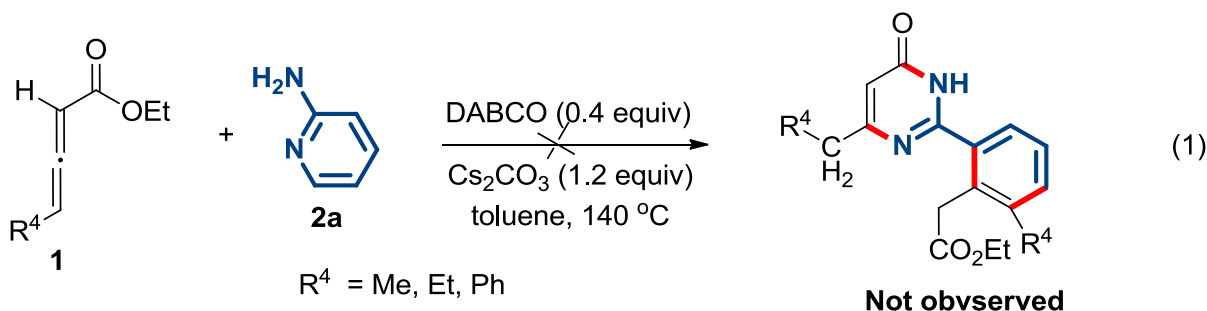

Under air atmosphere, a sealable reaction tube with a Teflon-coated screw cap equipped with a magnetic stir bar was charged with  $\gamma$ -substituted allenolate **1** (1.5 mmol), 2-aminopyridine derivatives **2** (0.5 mmol), DABCO (22.5 mg, 0.4 equiv),  $\text{CsCO}_3$  (195mg, 1.2 equiv) in toluene (5 mL) at room temperature. Then capped it and stirred at 140 °C for 12 h. After the reaction was completed, it was cooled to room temperature and monitored by TLC. And the reaction mixture was concentrated under vacuum. The residue was purified by flash chromatography on silica gel (eluant: petroleum ether/ethyl acetate) and no desired product was observed.

## 2) Experiment with deuterated allenolate

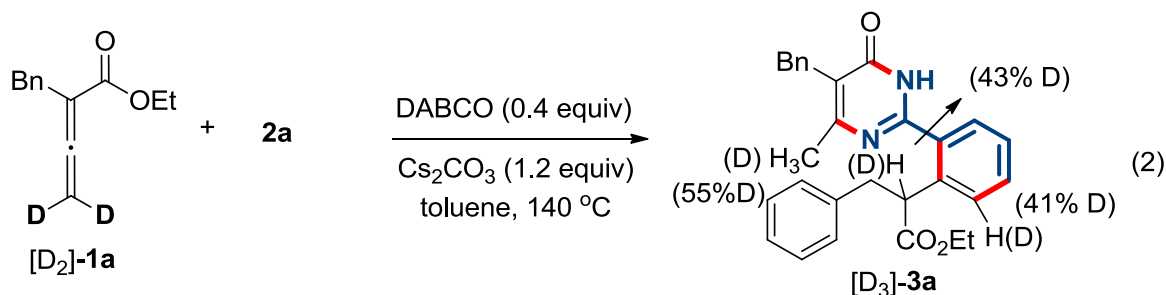

Under air atmosphere, a sealable reaction tube with a Teflon-coated screw cap equipped with a magnetic stir bar was charged with substituted allenolate **[D<sub>2</sub>]-1a** (1.5 mmol), 2-aminopyridine **2a** (0.5 mmol), DABCO (22.5 mg, 0.4 equiv), CsCO<sub>3</sub> (195mg, 1.2 equiv) in toluene (5 mL) at room temperature. Then capped it and stirred at 140 °C for 12 h. After the reaction was completed, it was cooled to room temperature and monitored by TLC. And the reaction mixture was concentrated under vacuum. The residue was purified by flash chromatography on silica gel (eluant: petroleum ether/ethyl acetate) to give the desired product **[D<sub>3</sub>]-3a**.

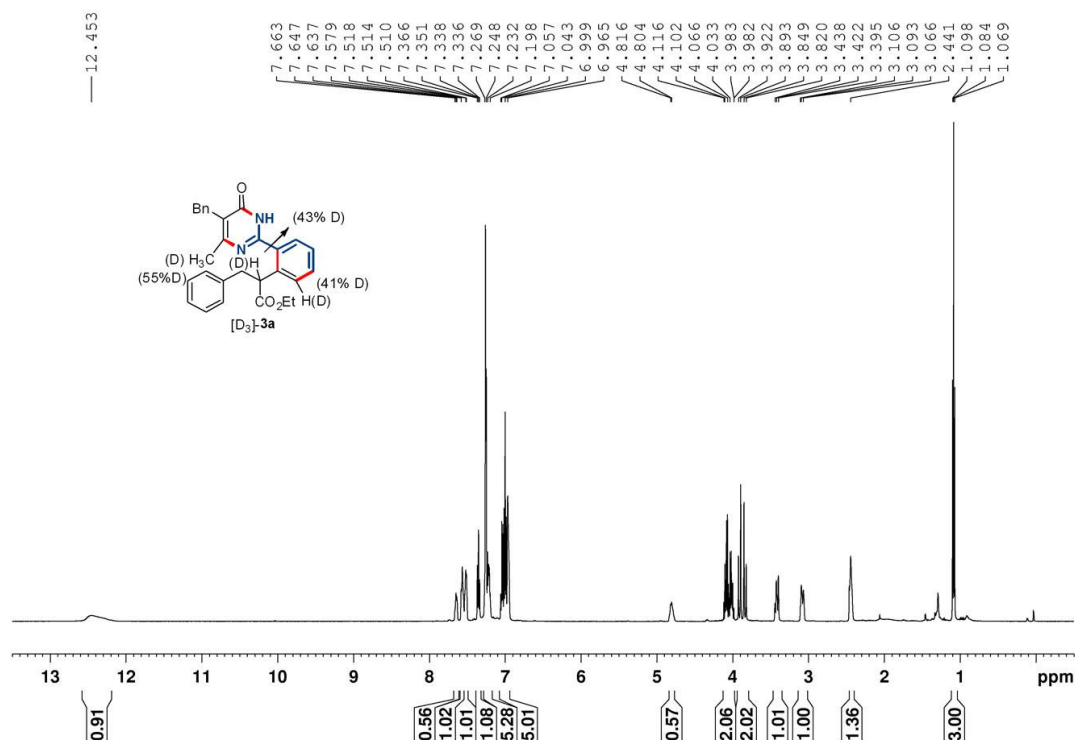

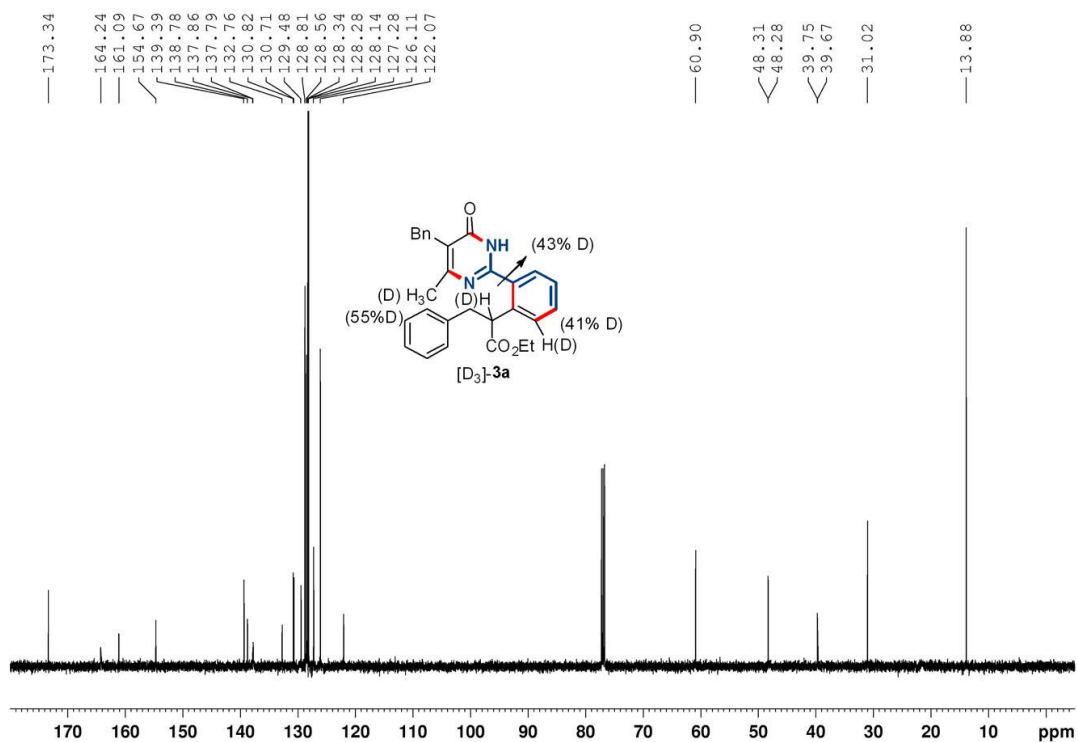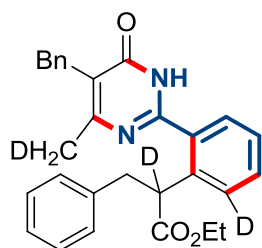

**[D<sub>3</sub>]-3a**

Chemical Formula: C<sub>29</sub>H<sub>26</sub>D<sub>3</sub>N<sub>2</sub>O<sub>3</sub>  
[M+H]<sup>+</sup>

Calcd: 456.2361  
Found: 456.2355

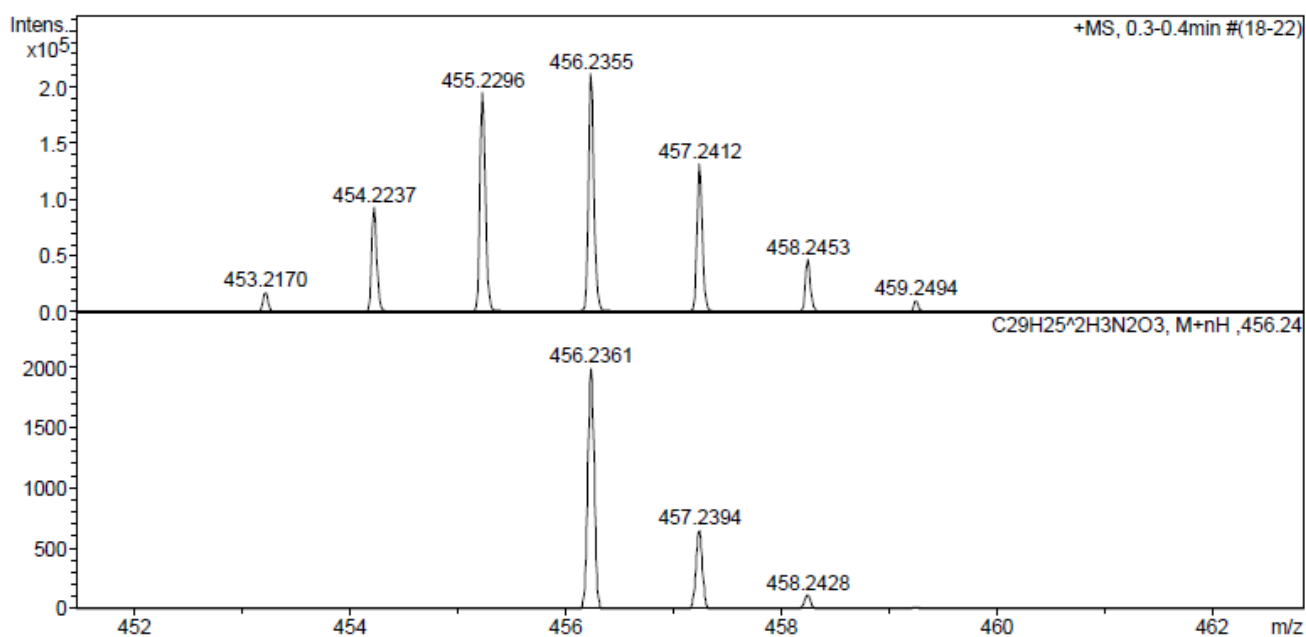

c) To find out further application of the resultant products

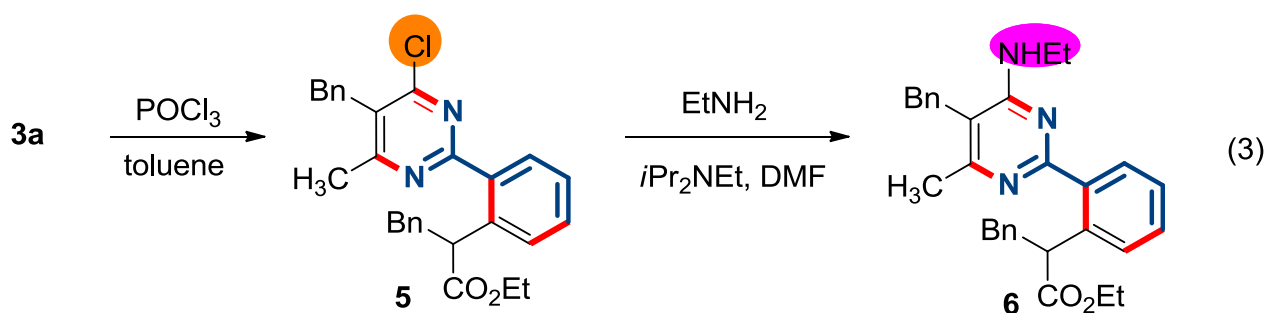

**Step 1:** Under air atmosphere, a sealable reaction tube with a Teflon-coated screw cap equipped with a magnetic stir bar was charged with compounds **3a** (0.23g, 0.5 mmol), N,N-dimethylaniline (0.63 mL, 5.0 mmol), POCl<sub>3</sub> (0.47 mL, 5.0 mmol) in toluene (5.0 mL) at room temperature. The rubber septum was then replaced by a Teflon-coated screw cap, and the reaction vessel placed in an oil bath at 60 °C for 3h. After the reaction was completed, it was cooled to room temperature and monitored by TLC. And the reaction mixture was concentrated under vacuum. The residue was purified by flash chromatography on silica gel (eluant: petroleum ether/ethyl acetate = 10:1) to give the desired product **5** (0.216 g, 92% yield ).

**Step 2:** Under air atmosphere, a sealable reaction tube with a Teflon-coated screw cap equipped with a magnetic stir bar was charged with compounds **5** (0.24g, 0.5 mmol), Ethylamine (0.035 mL, 0.55 mmol), Et<sub>3</sub>N (0.21 mL, 1.5 mmol) in DMF (5.0 mL) at room temperature. The rubber septum was then replaced by a Teflon-coated screw cap, and the reaction vessel placed in an oil bath at 100 °C for 18h. After the reaction was completed, it was cooled to room temperature and monitored by TLC. And the reaction mixture was washed with water and concentrated under vacuum. The residue was purified by flash chromatography on silica gel (eluant: petroleum ether/ethyl acetate = 10:1) to give the desired product **6** (0.108g, 45% yield).

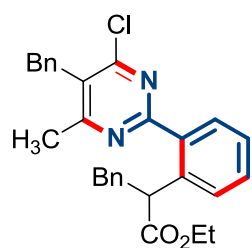

(5): 216 mg, 92% yield. Yellow oil.  $^1\text{H}$  NMR (500 MHz,  $\text{CDCl}_3$ ):  $\delta$  (ppm) = 7.91-7.89 (m, 1H), 7.61-7.59 (m, 1H), 7.48-7.44 (m, 1H), 7.39-7.33 (m, 3H), 7.29-7.26 (m, 1H), 7.20-7.15 (m, 7H), 5.05-5.02 (m, 1H), 4.26 (s, 2H), 4.04-4.01 (m, 2H), 3.48-3.43 (m, 1H), 3.23-3.19 (m, 1H), 2.56 (s, 3H), 1.06 (t,  $J = 7.1$  Hz, 3H),  $^{13}\text{C}$  NMR (125 MHz,  $\text{CDCl}_3$ ):  $\delta$  (ppm) = 173.6, 168.1, 164.4, 161.3, 139.5, 138.0, 136.9, 136.4, 131.1, 130.0, 128.9, 128.7, 128.3, 128.0, 127.9, 127.7, 127.1, 126.7, 125.9, 60.5, 48.6, 39.8, 34.4, 22.9, 13.9. HRMS (ESI): calcd for  $\text{C}_{29}\text{H}_{28}\text{ClN}_2\text{O}_2$   $[\text{M}+\text{H}]^+$  453.2173, Found: 453.2180.

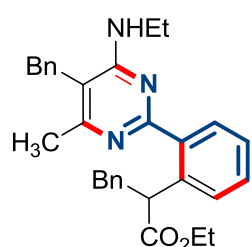

(6): 108 mg, 45% yield. Yellow oil.  $^1\text{H}$  NMR (500 MHz,  $\text{CDCl}_3$ ):  $\delta$ (ppm) = 7.82-7.80 (m, 1H), 7.55-7.53 (m, 1H), 7.36-7.33 (m, 4H), 7.29-7.27 (m, 1H), 7.19-7.09 (m, 7H), 5.23-5.20 (m, 1H), 4.48 (s, 1H), 4.05-3.93 (m, 4H), 3.39-3.35 (m, 3H), 3.16-3.12 (m, 1H), 2.50 (s, 3H), 1.06 (t,  $J = 7.2$  Hz, 3H), 1.00 (t,  $J = 7.2$  Hz, 3H),  $^{13}\text{C}$  NMR (125 MHz,  $\text{CDCl}_3$ ):  $\delta$  (ppm) = 174.0, 163.9, 161.8, 160.6, 140.0, 139.1, 137.5, 137.2, 130.6, 129.0, 128.9, 128.8, 127.9, 127.7, 127.6, 127.0, 126.9, 125.9, 110.3, 60.4, 48.3, 40.2, 35.9, 31.7, 21.8, 14.8, 13.9. HRMS (ESI): calcd for  $\text{C}_{31}\text{H}_{34}\text{N}_3\text{O}_2$   $[\text{M}+\text{H}]^+$  480.2651, Found: 480.2655.

## 5 $^1\text{H}$ NMR and $^{13}\text{C}$ NMR Spectra of All Compounds

### Compound 3a

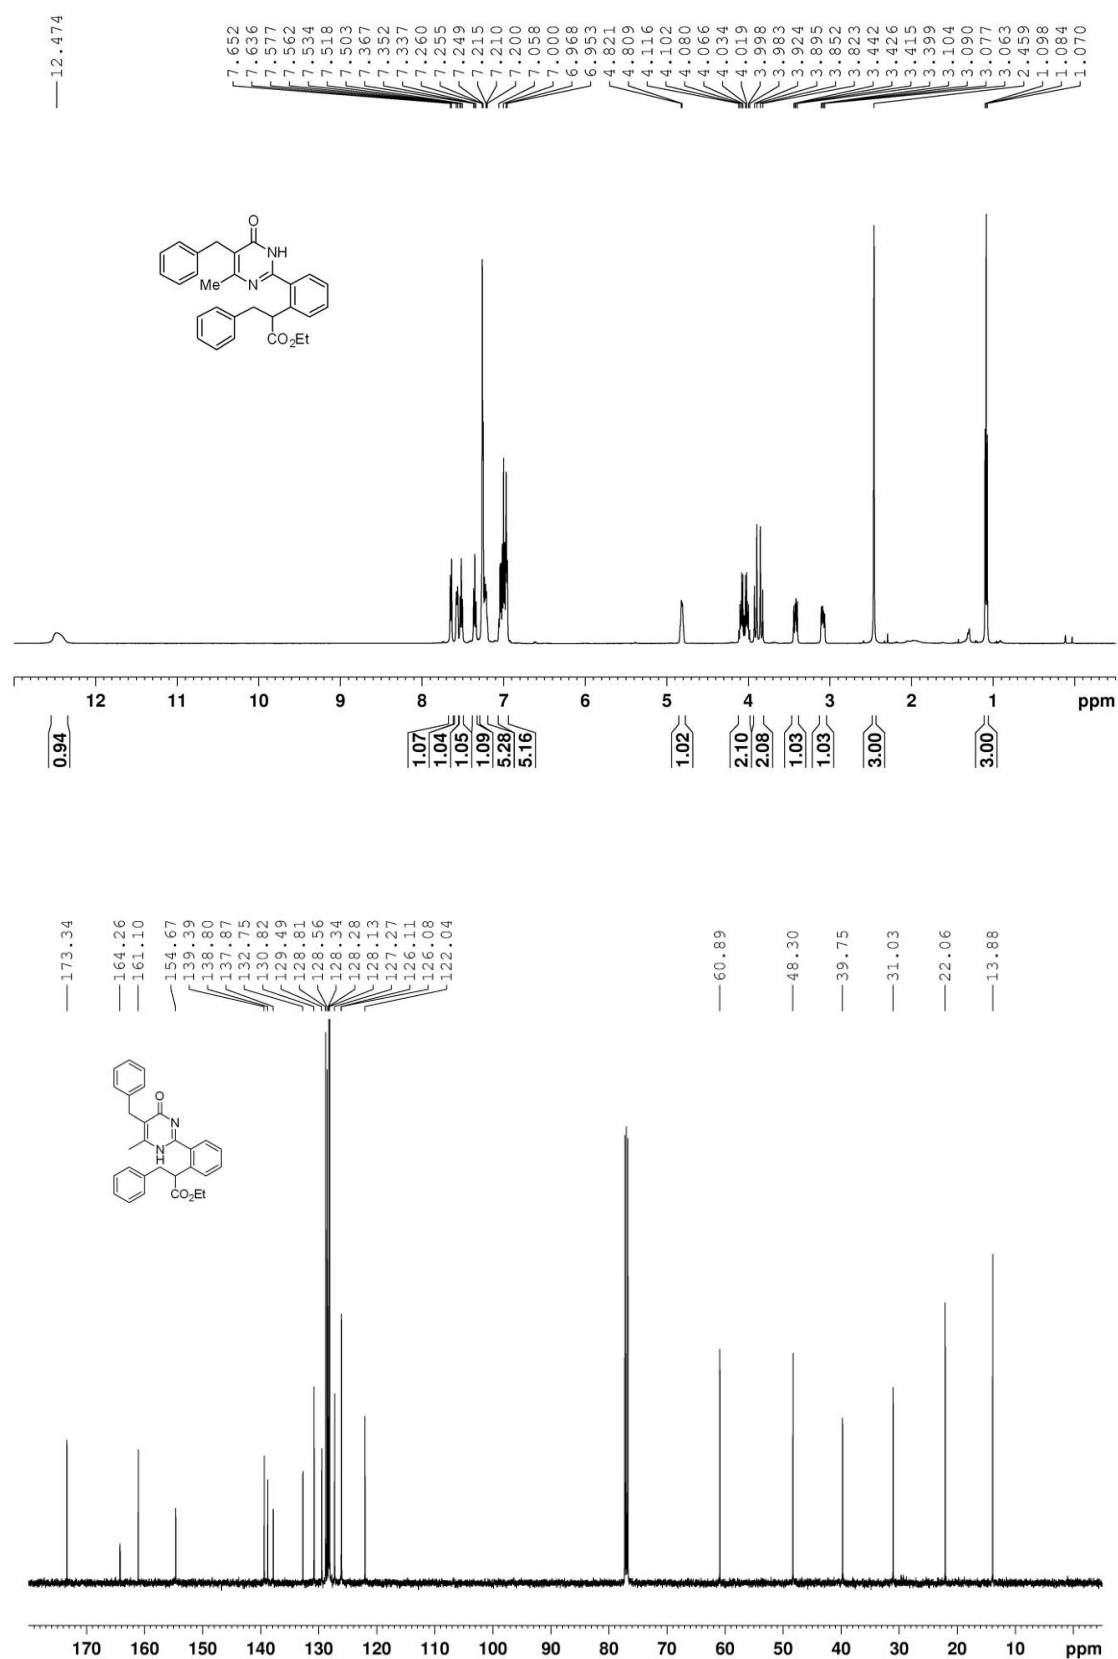



# Compound **3b**

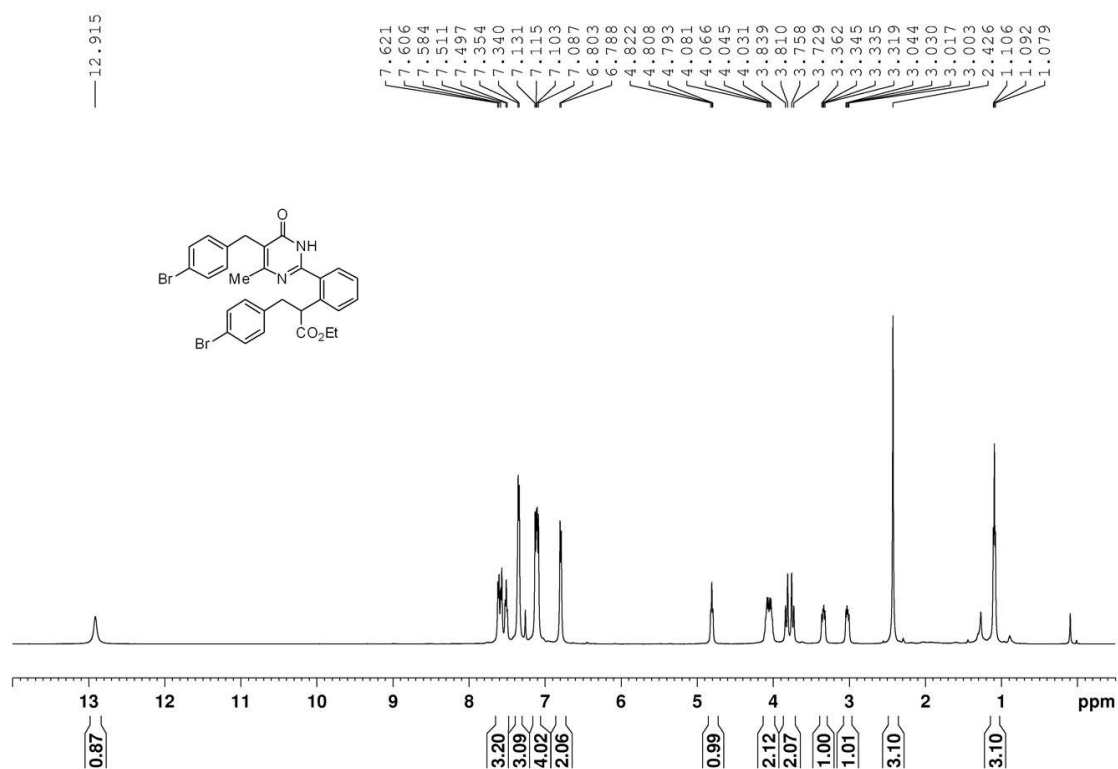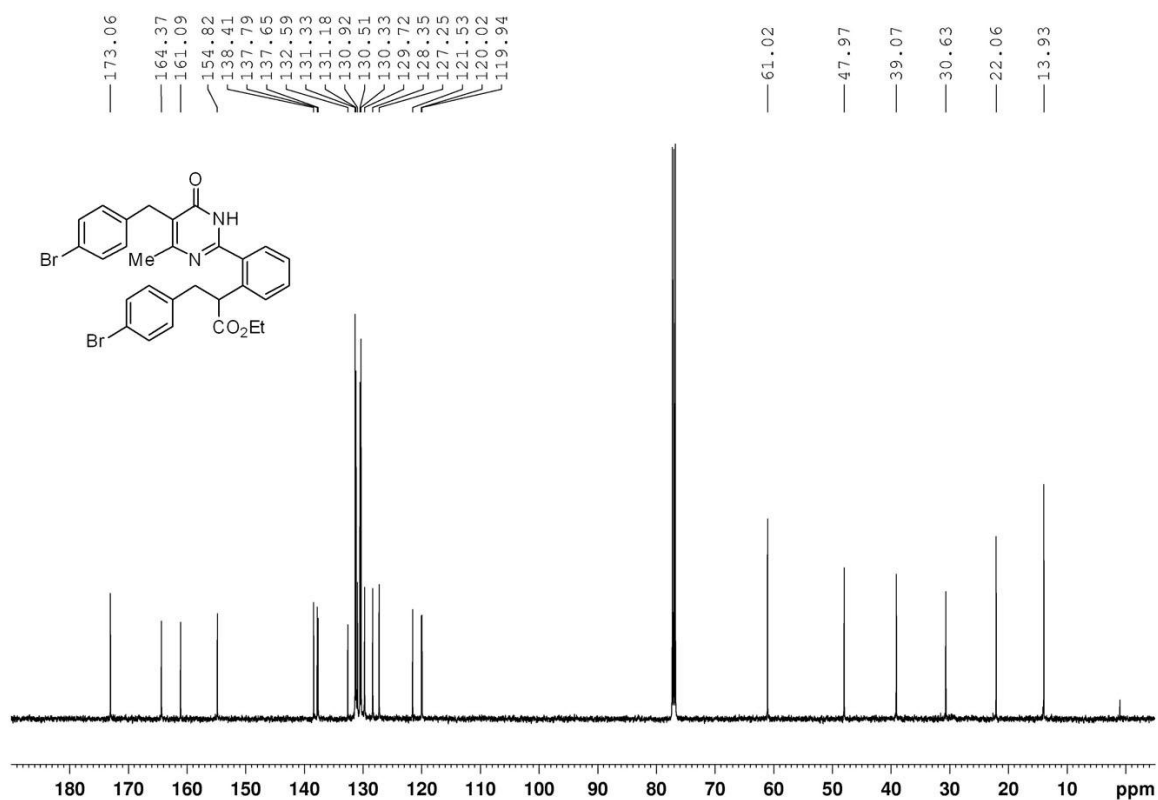

# Compound 3c

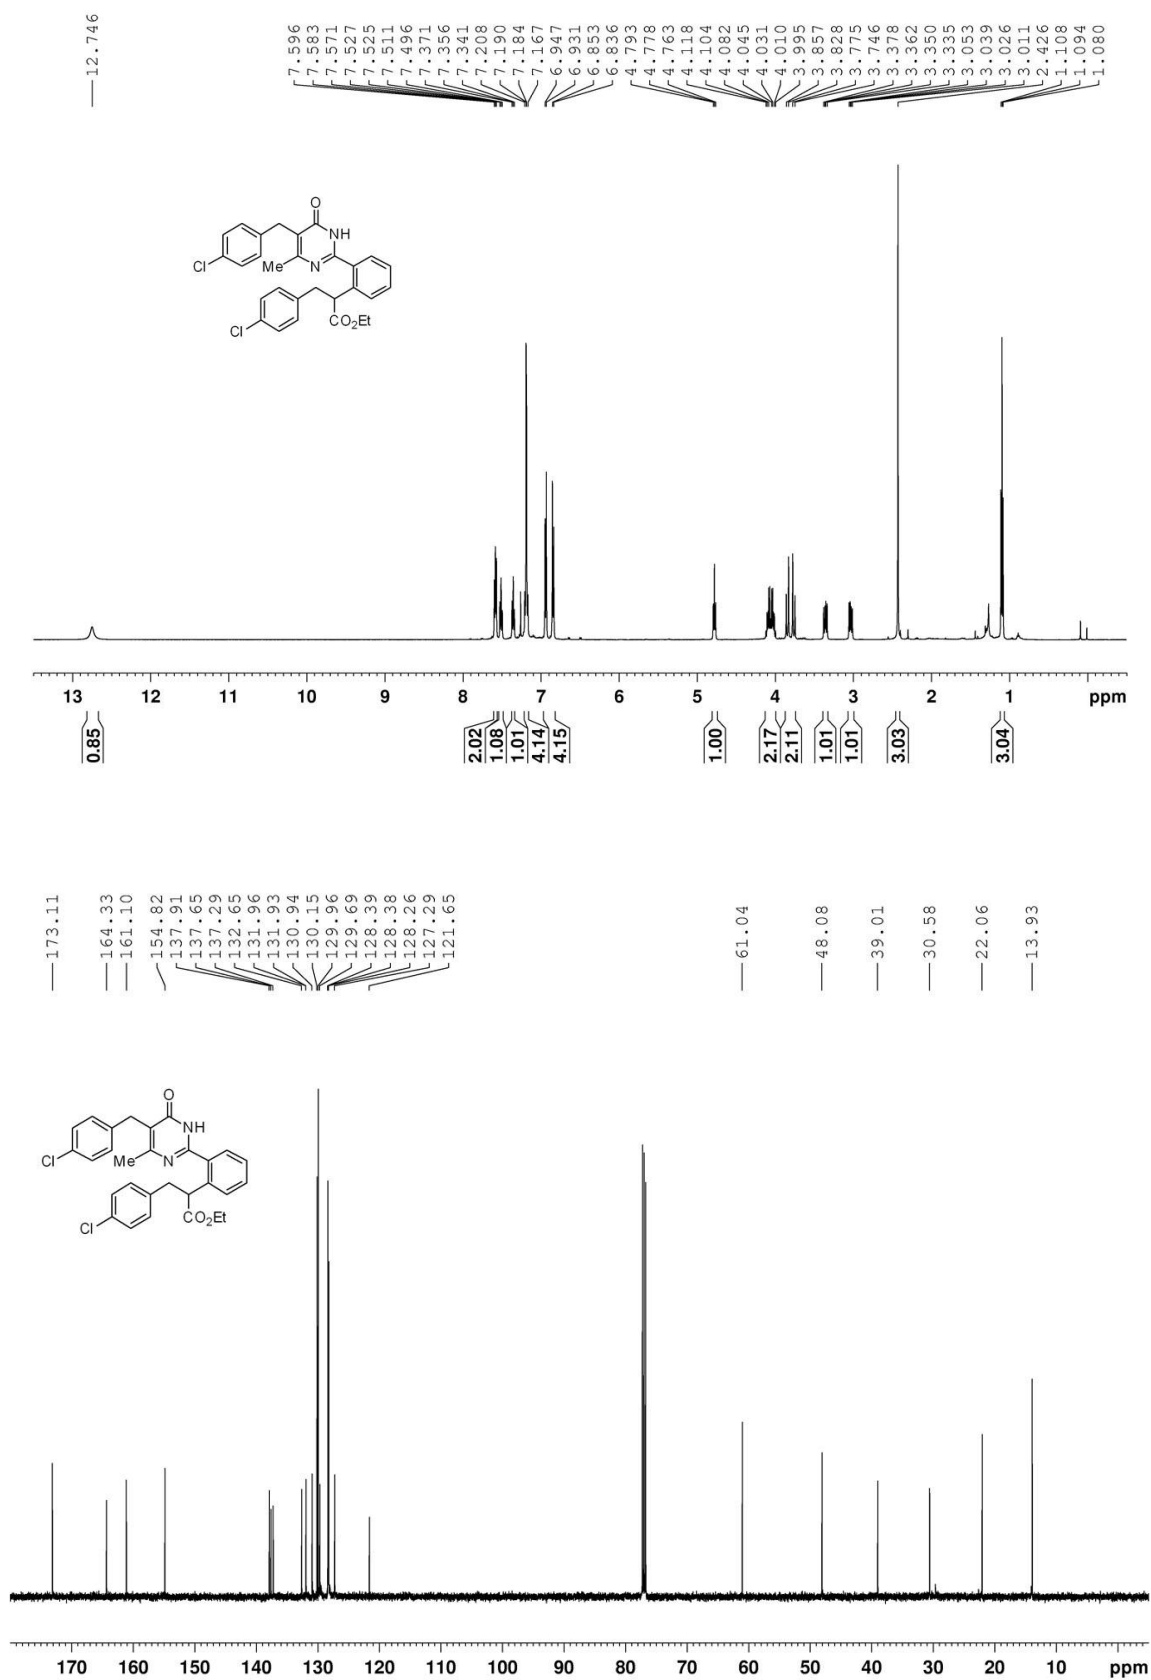

# Compound **3d**

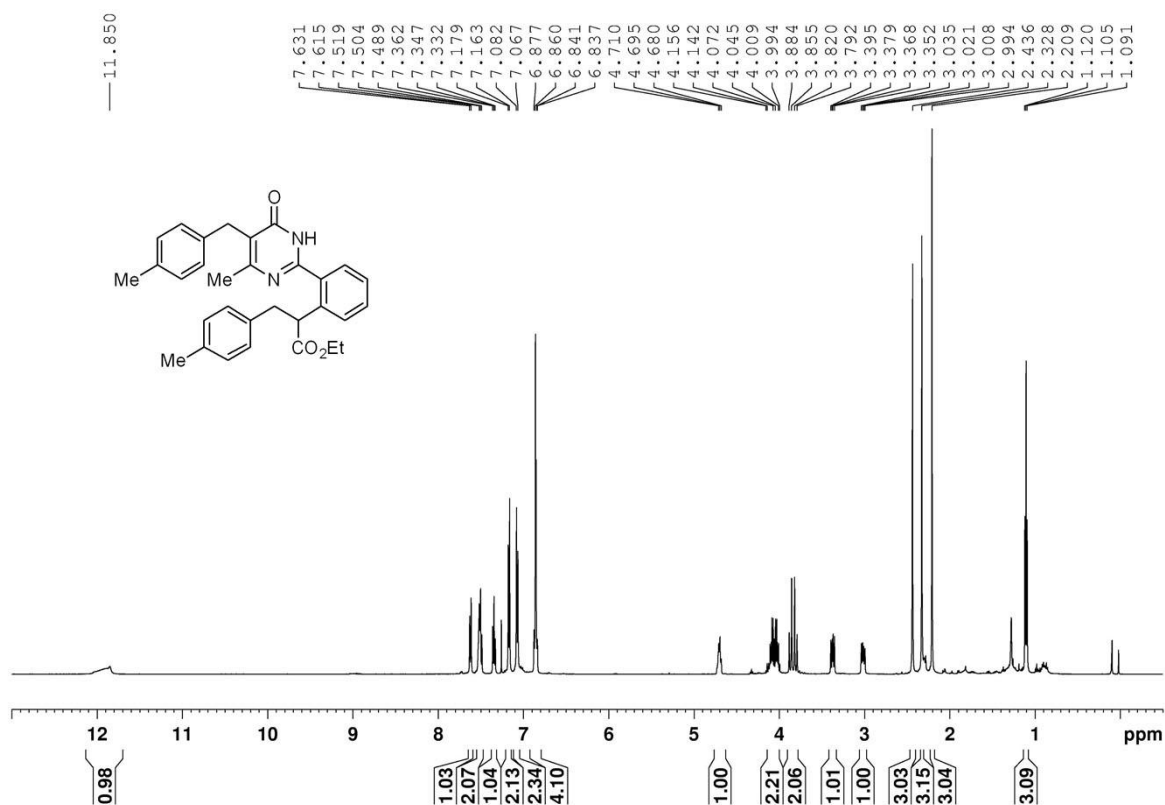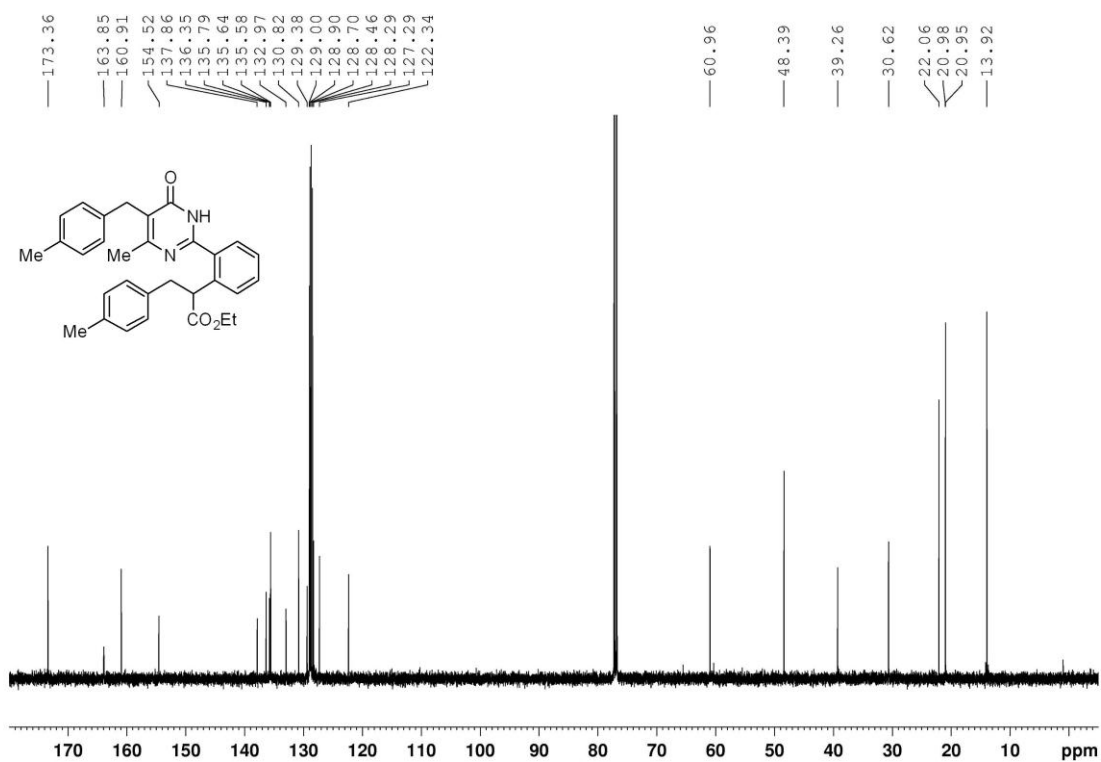

# Compound **3e**

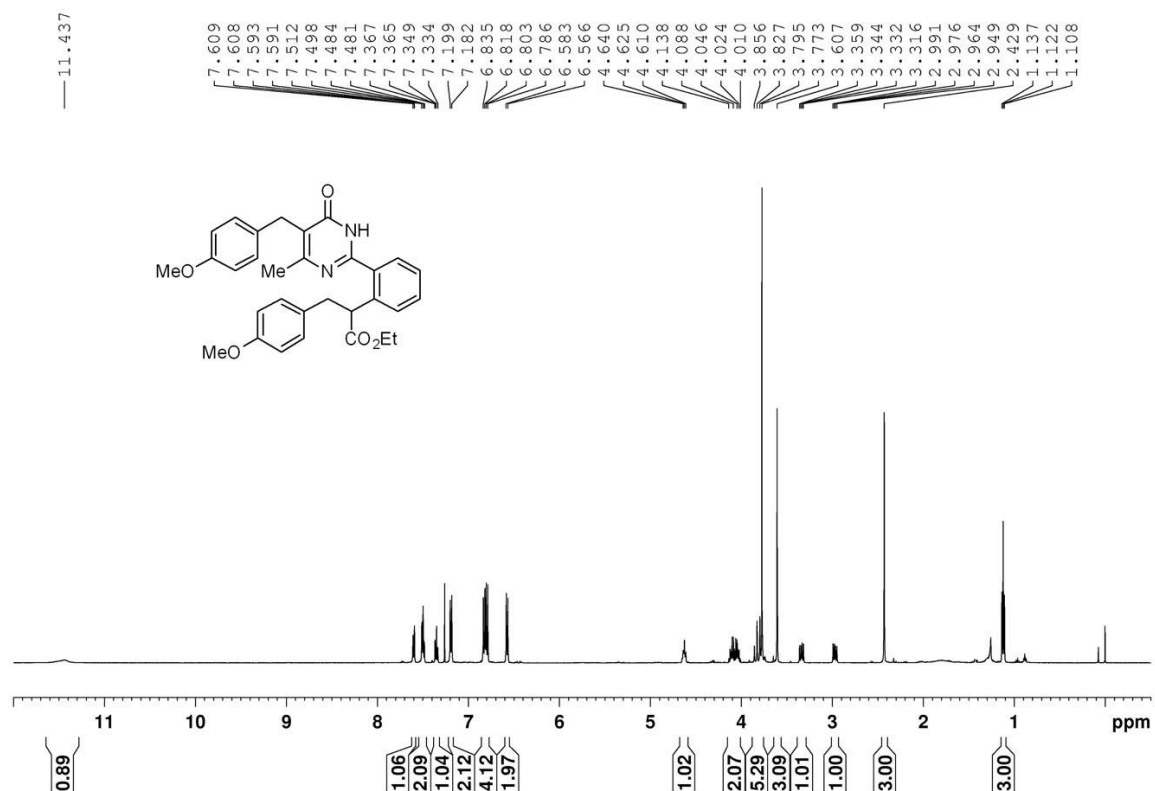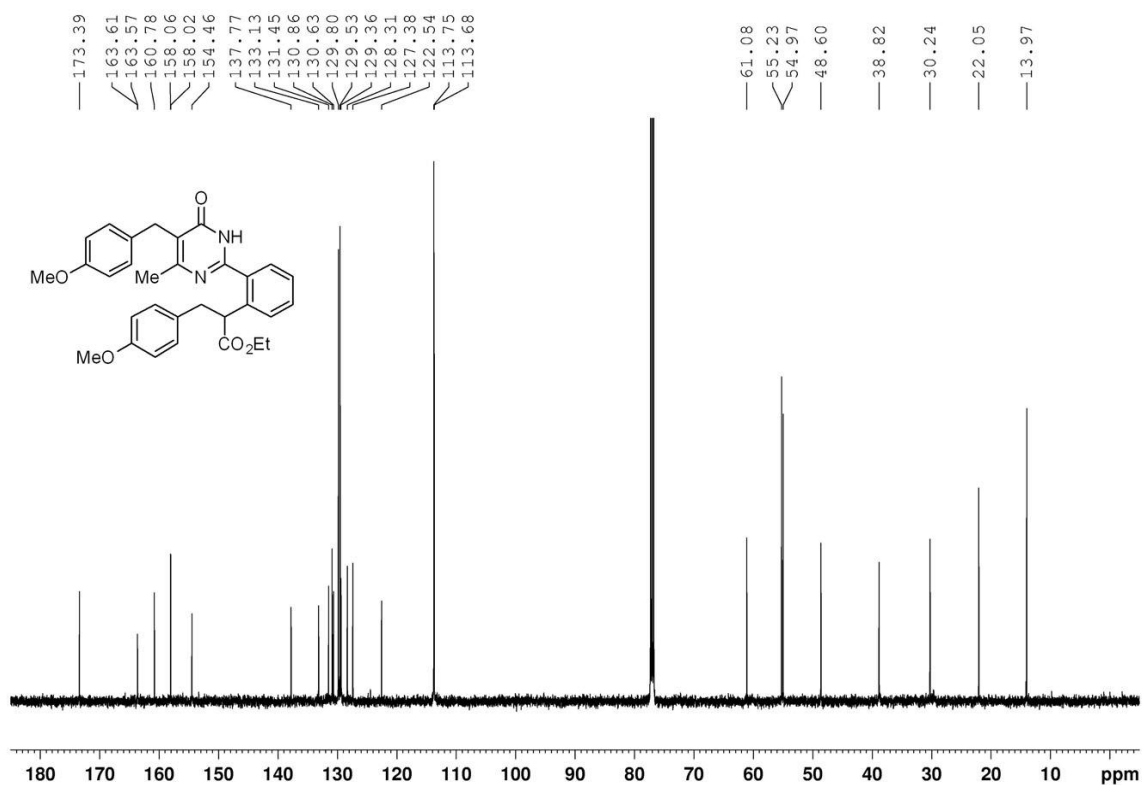

# Compound **3f**

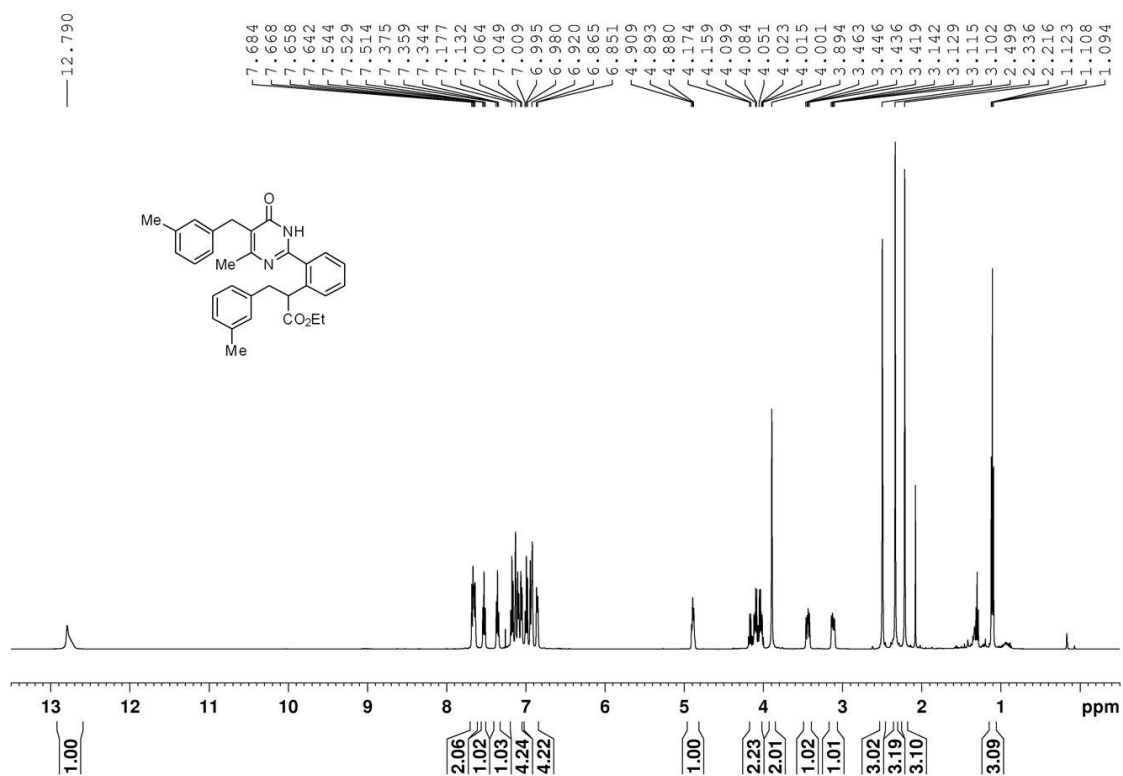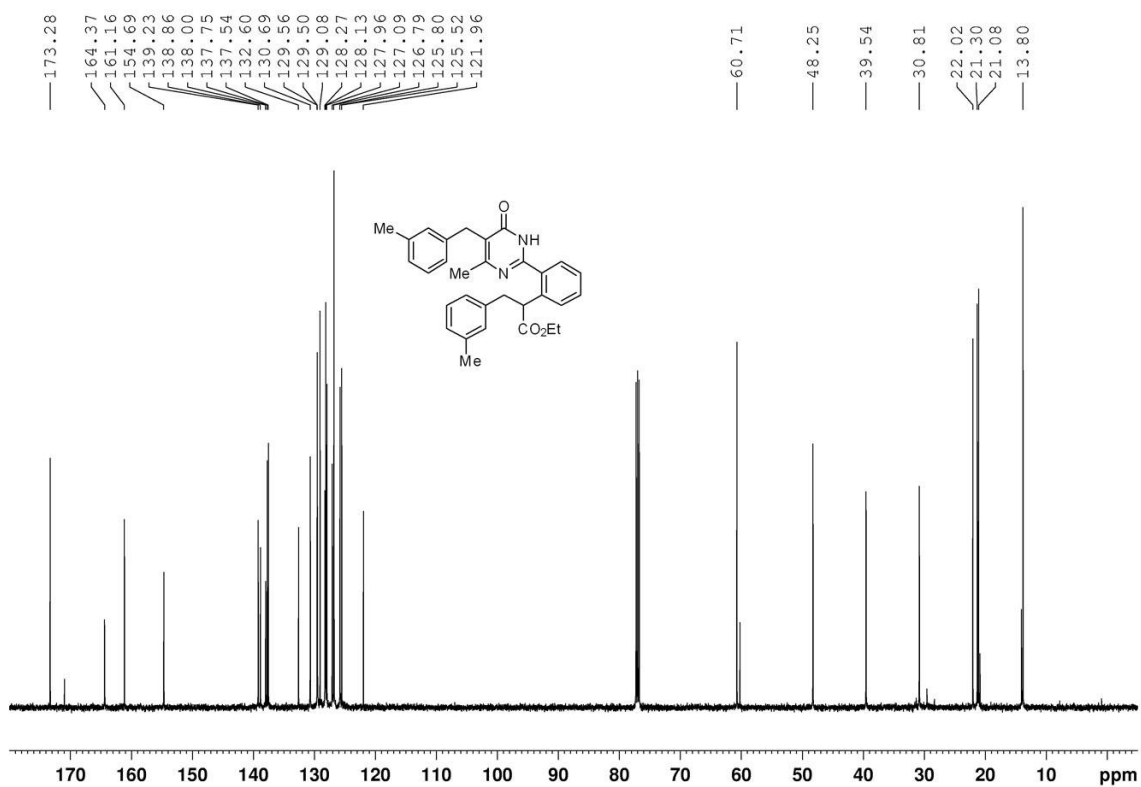

# Compound **3g**

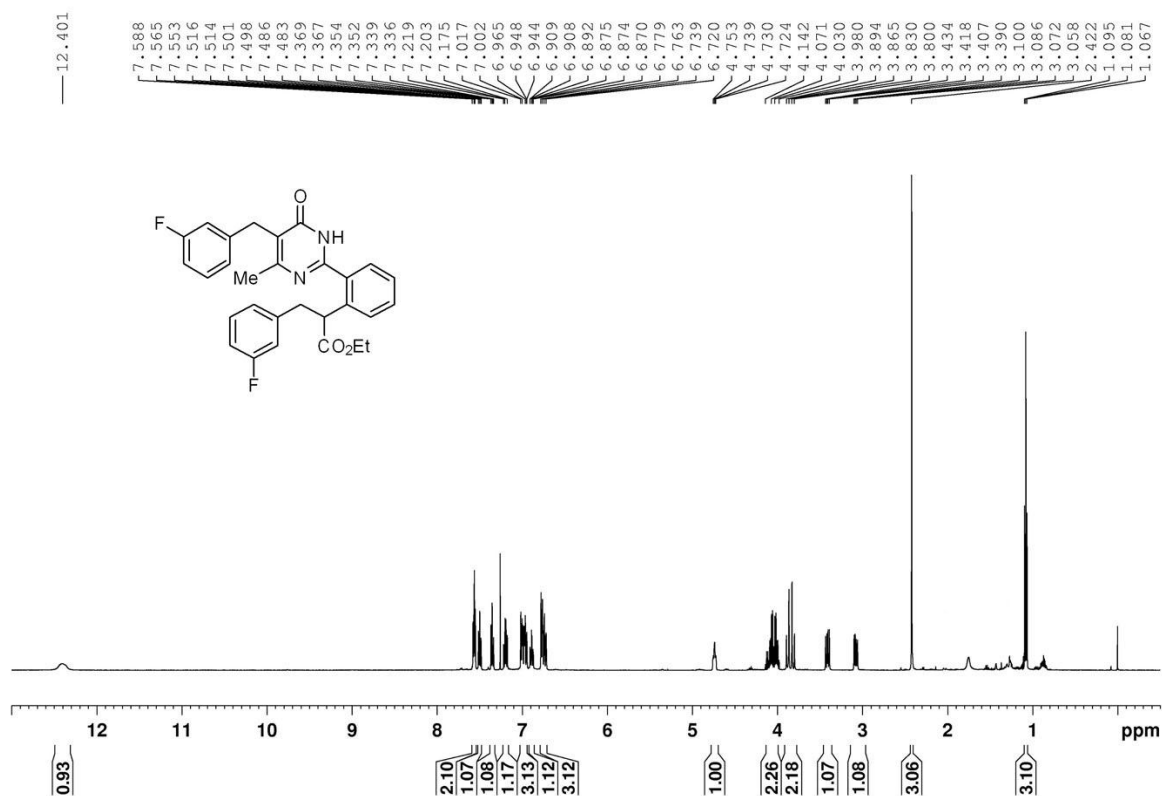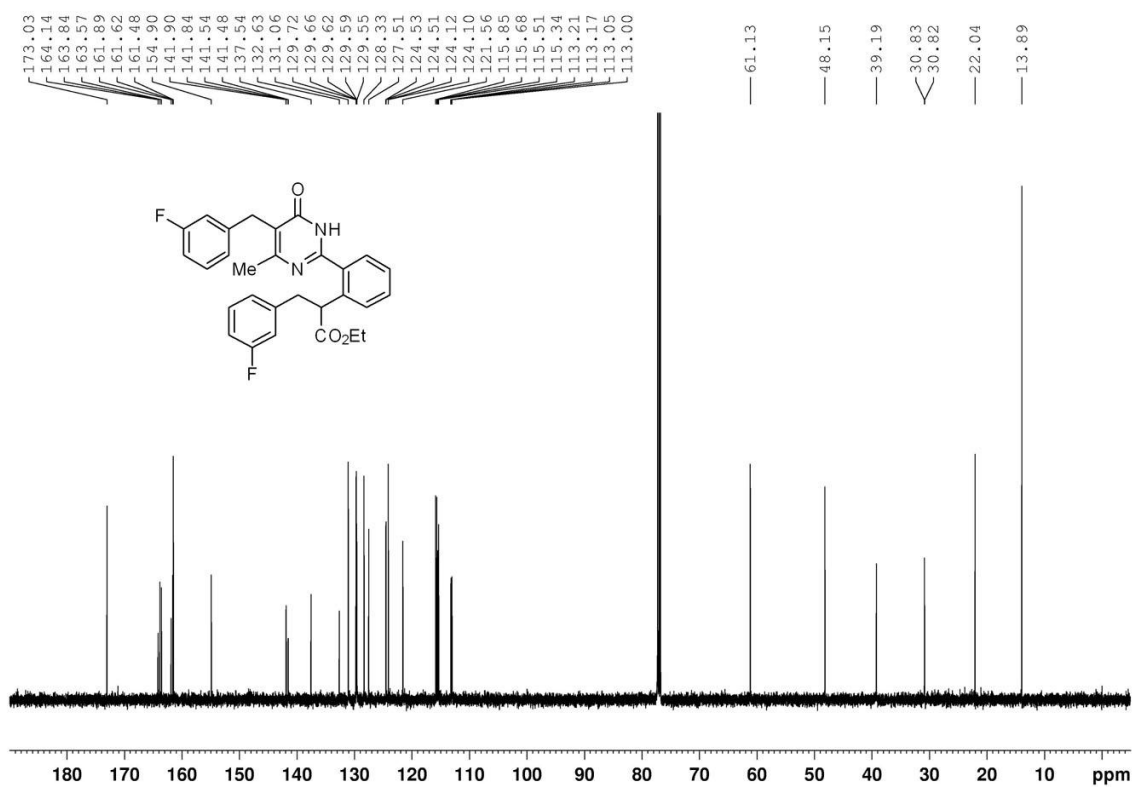

# Compound 3h

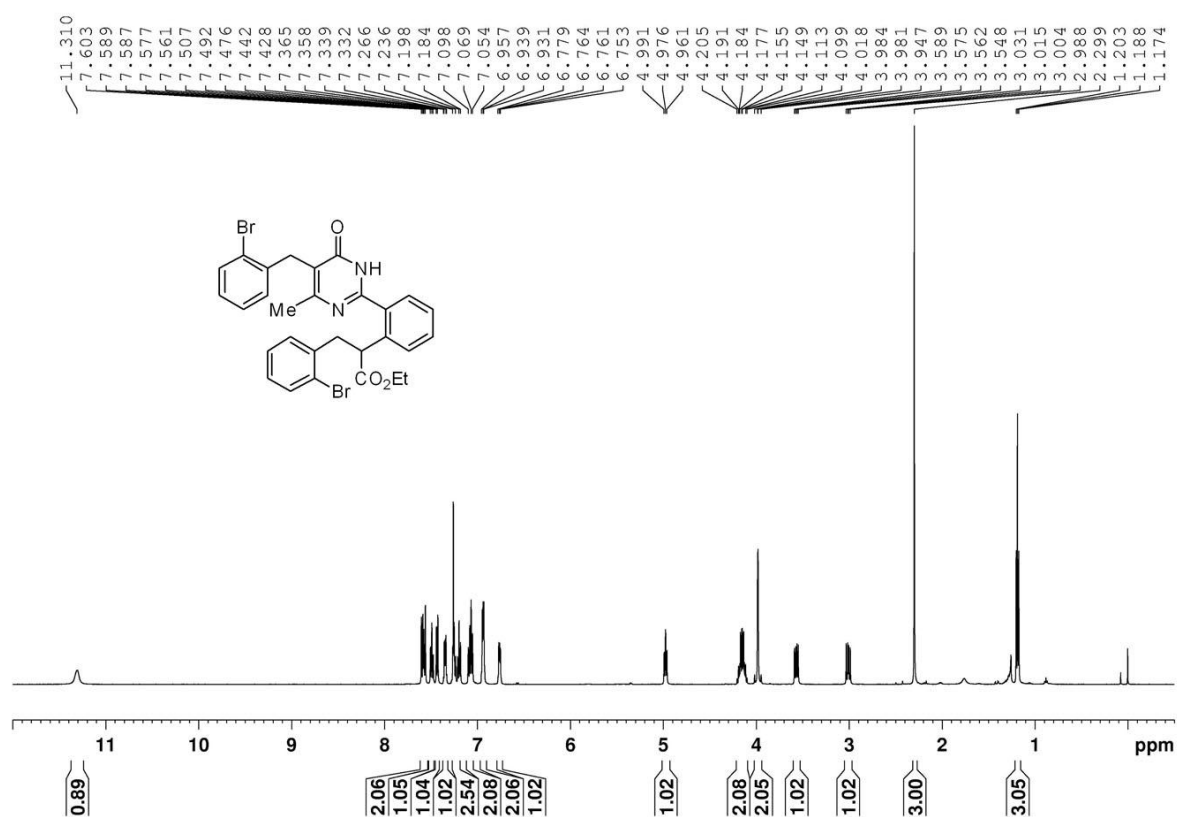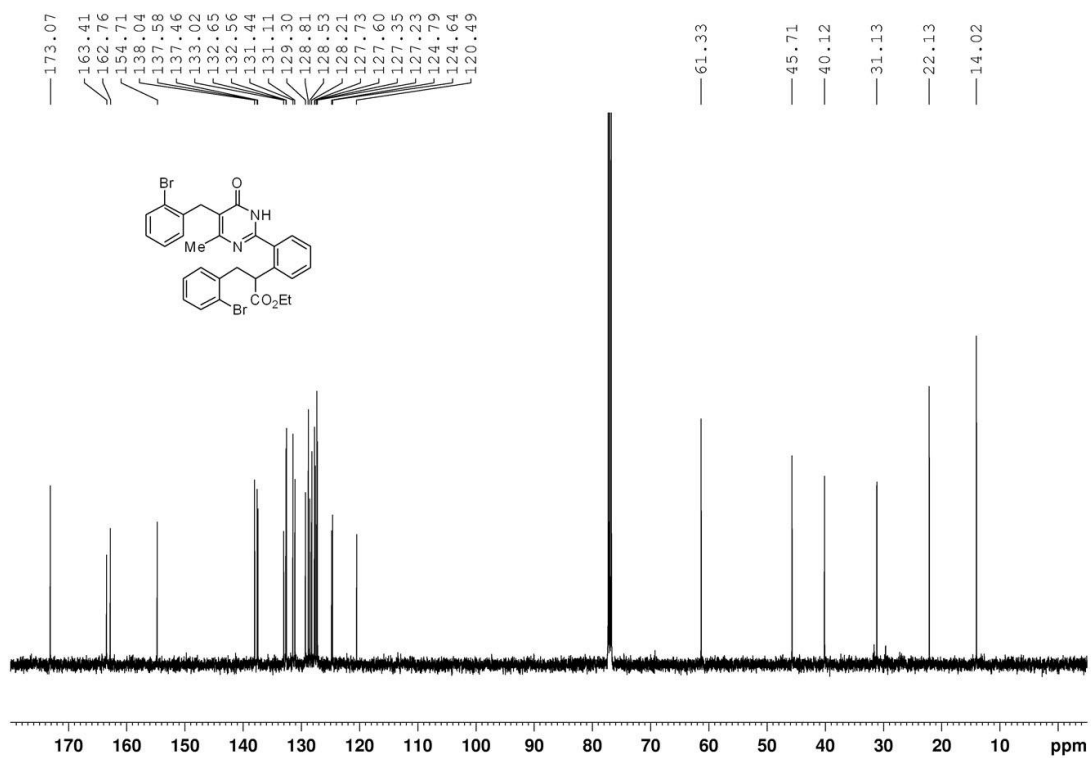

# Compound **3i**

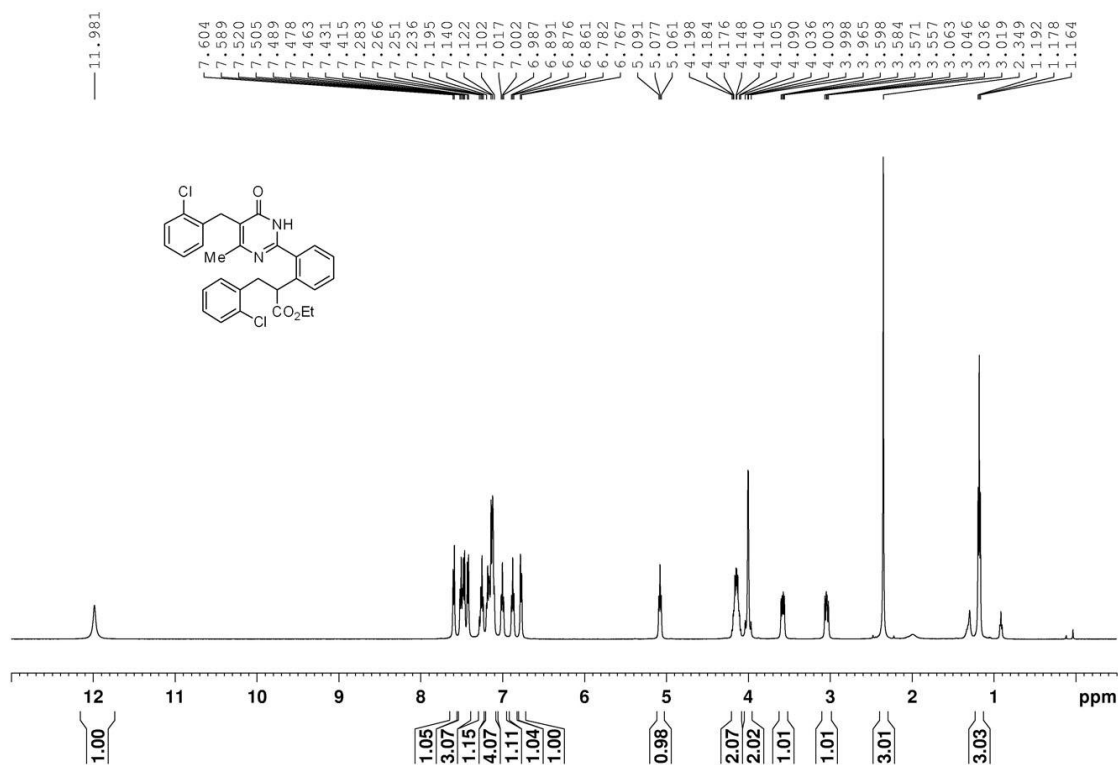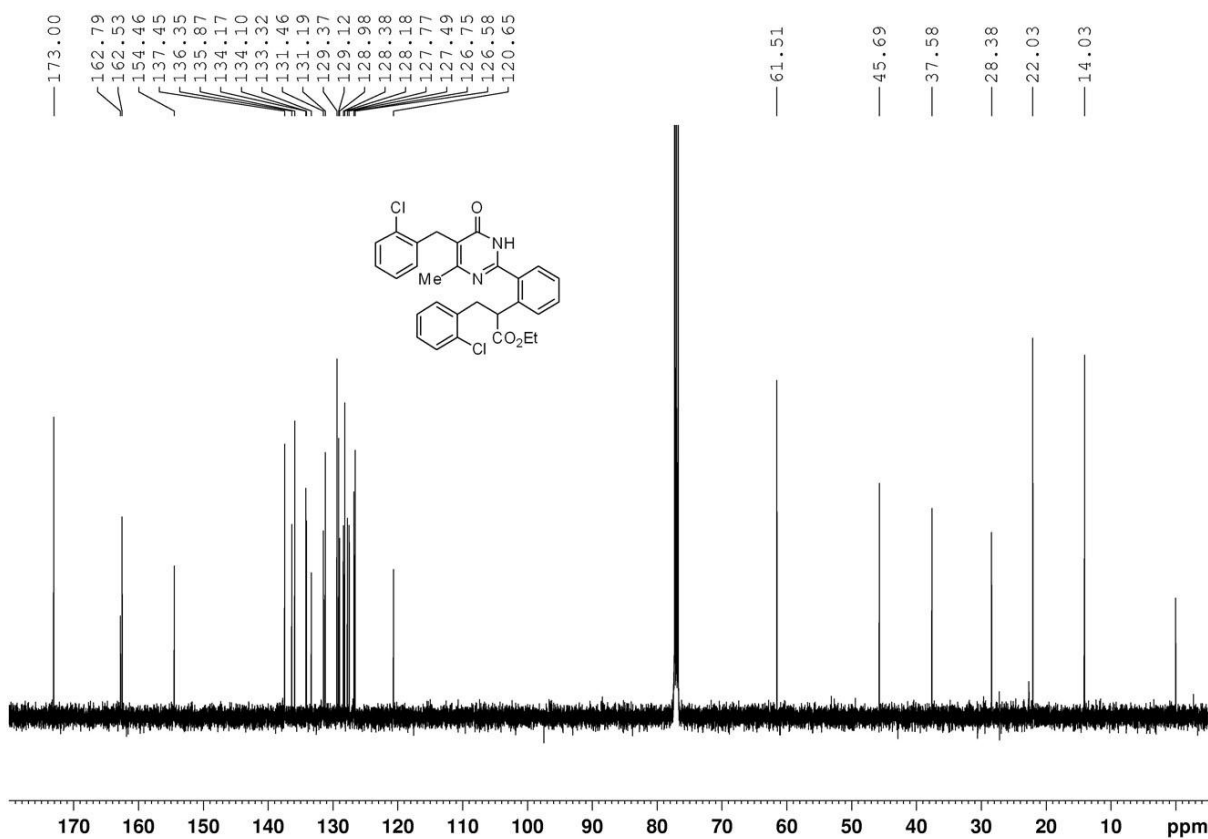



# Compound 3j

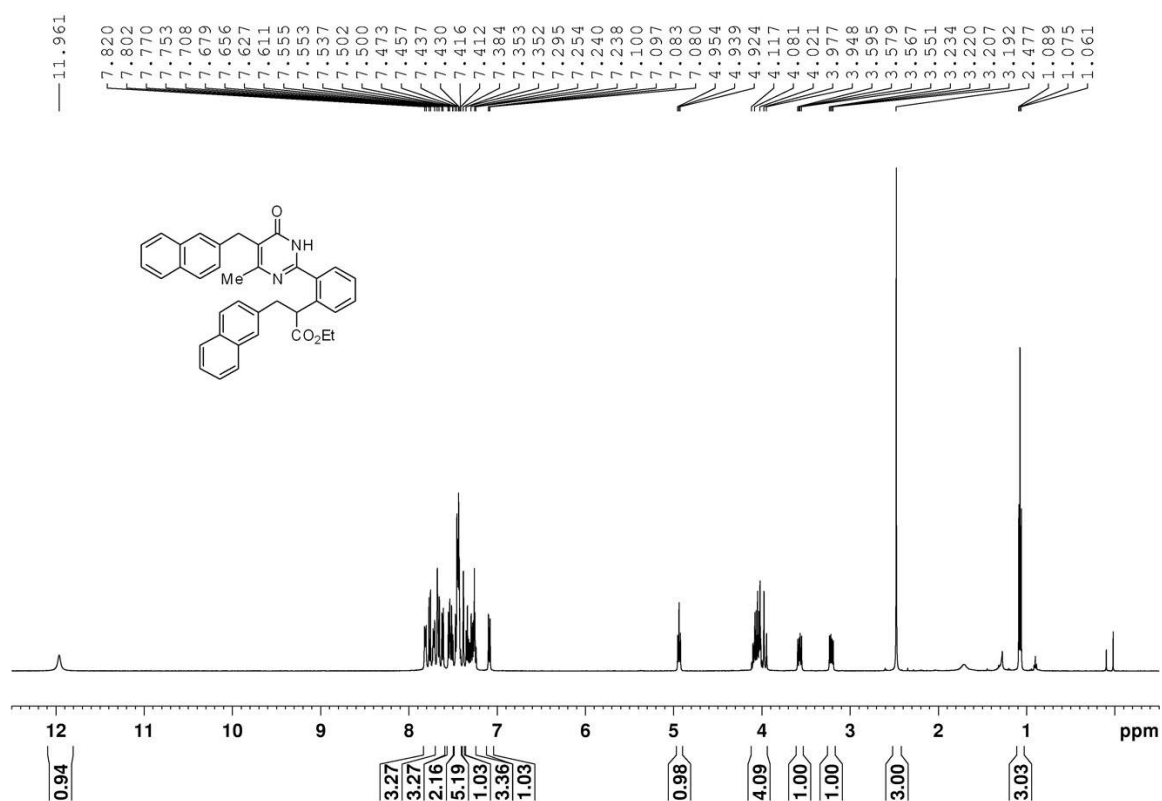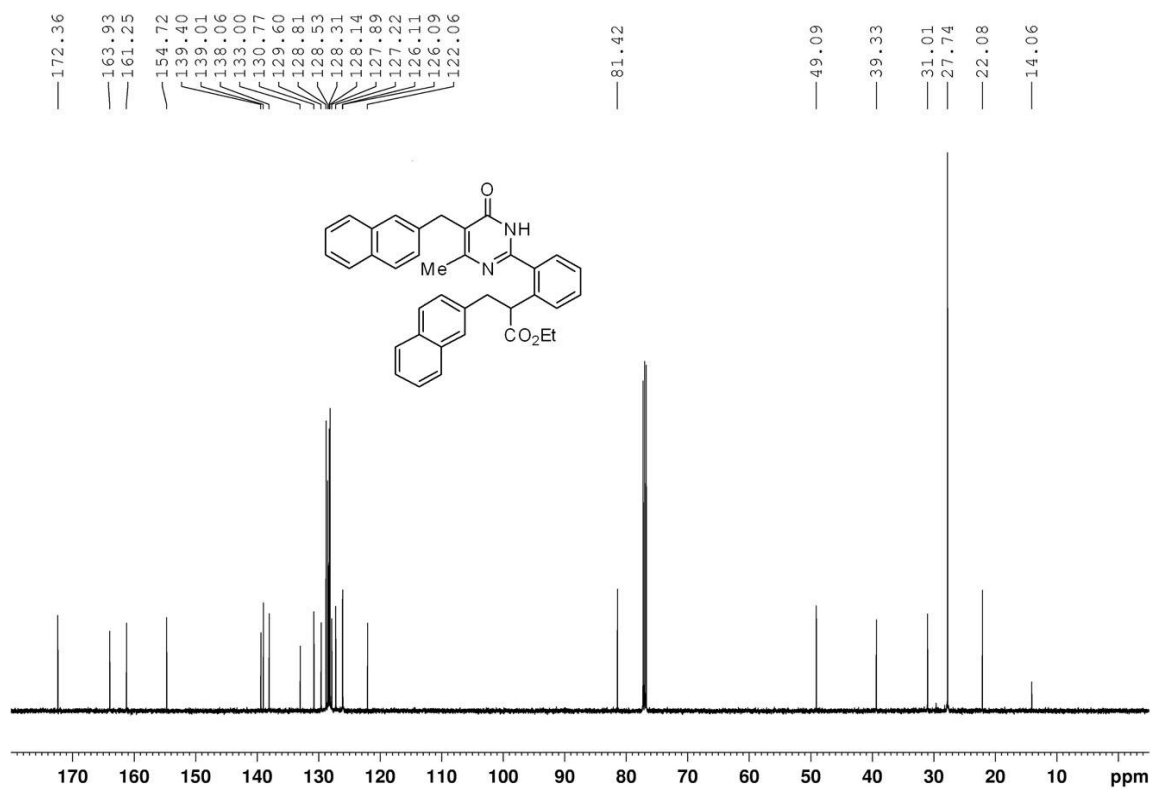

# Compound **3k**

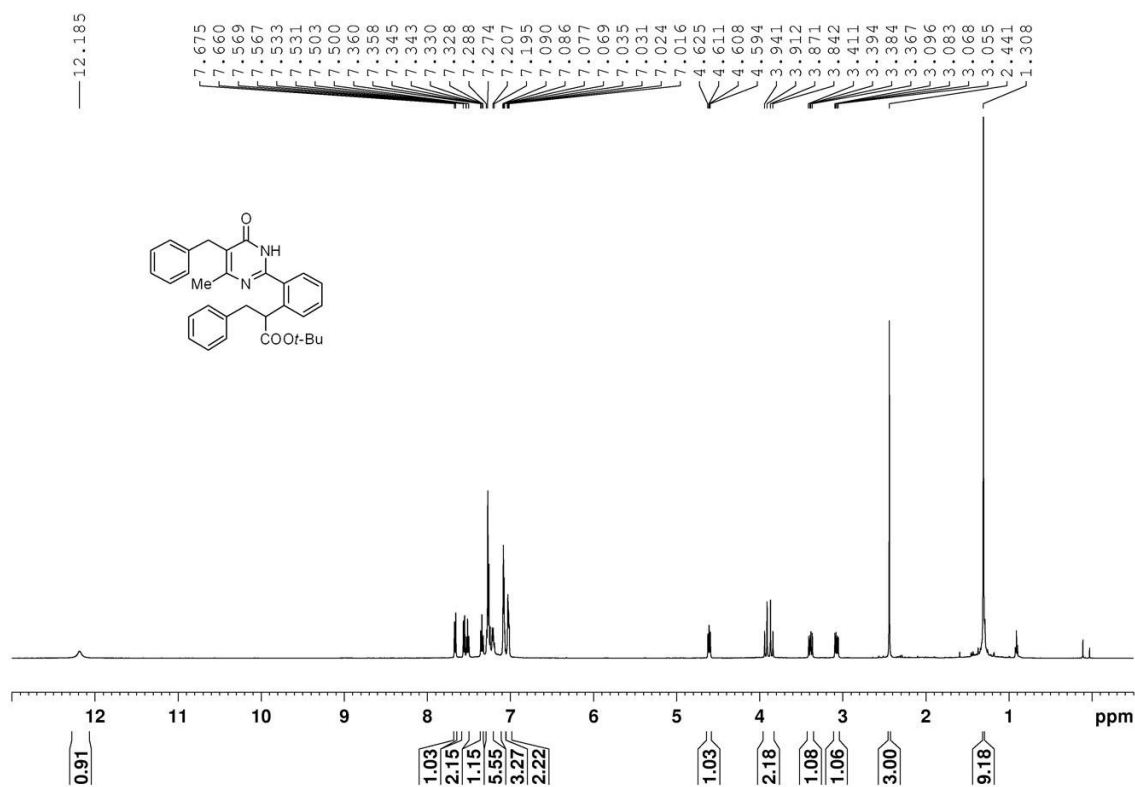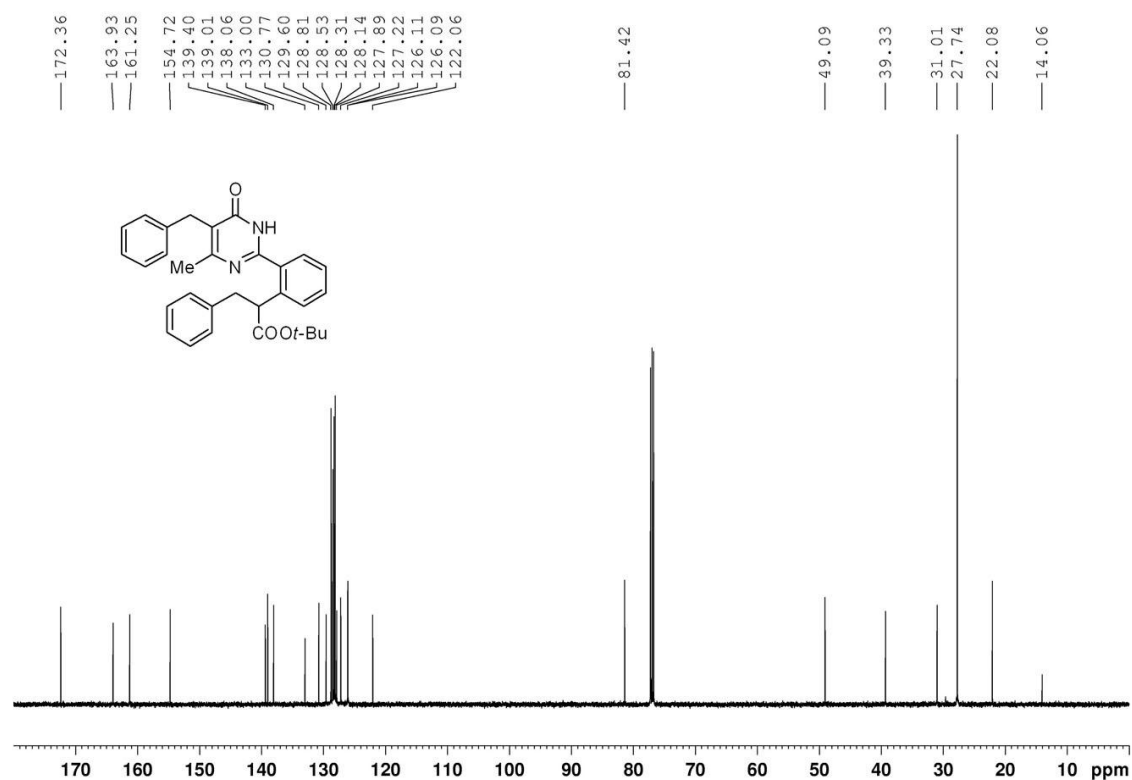

# Compound 3l

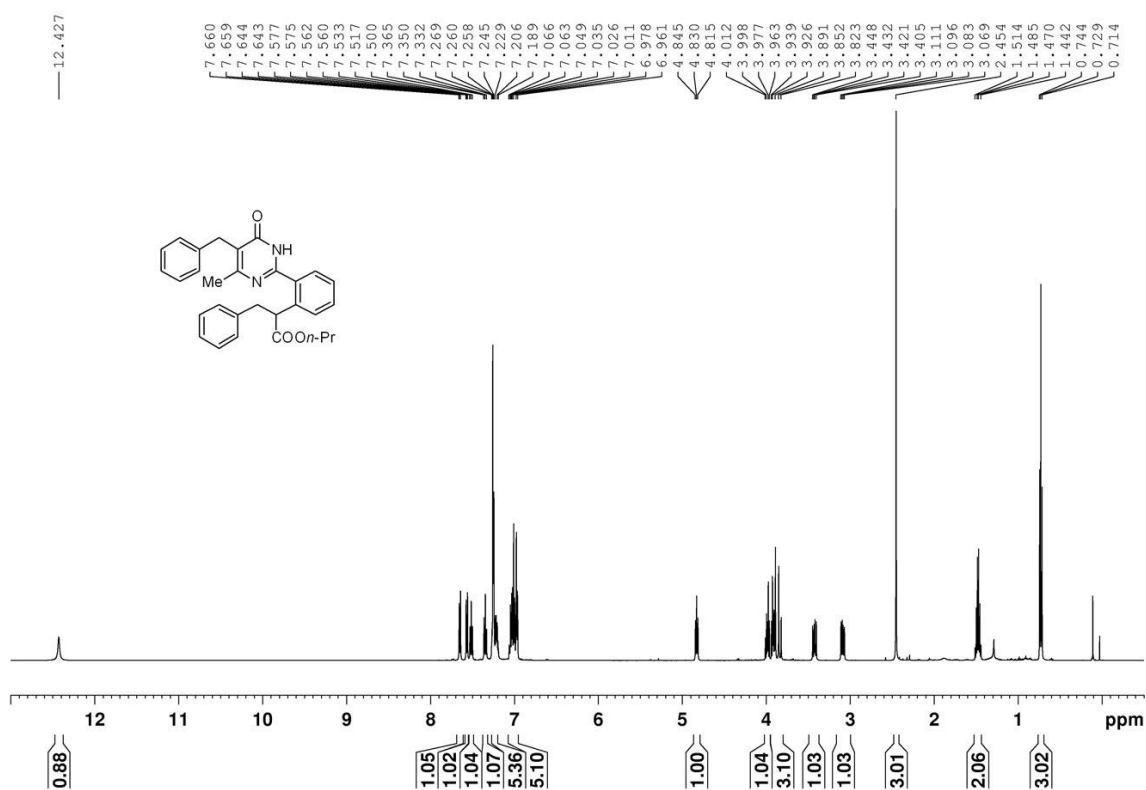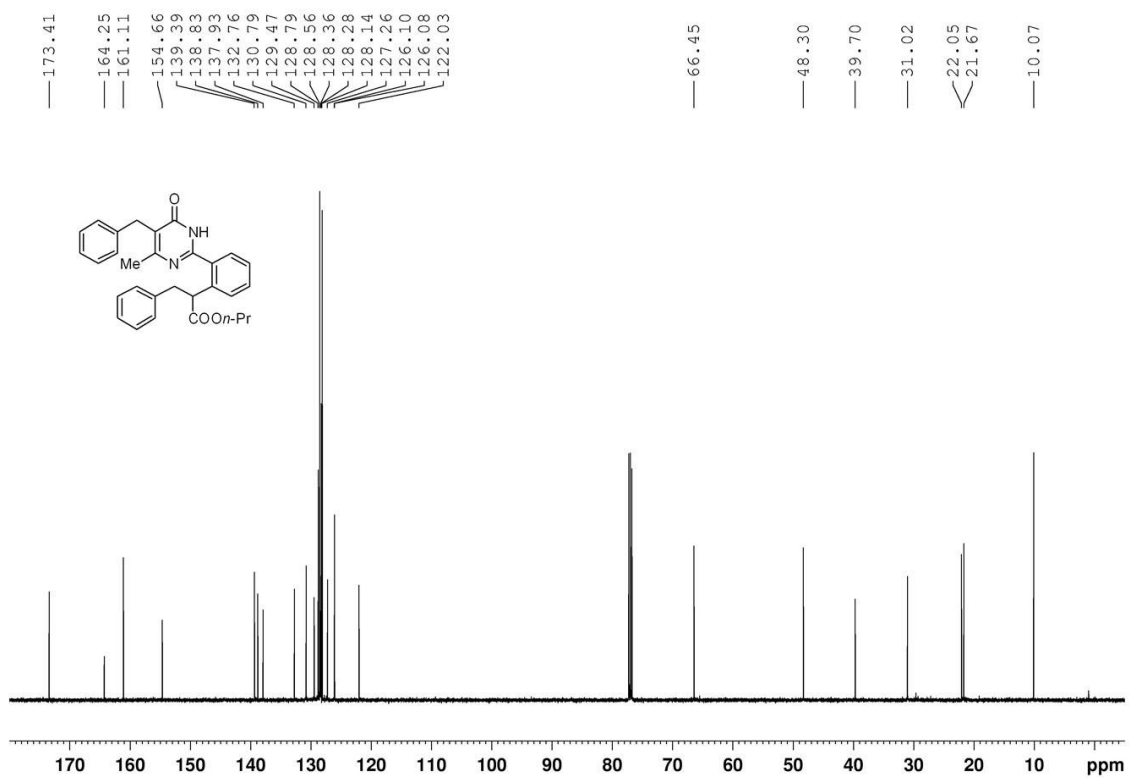

# Compound 4a

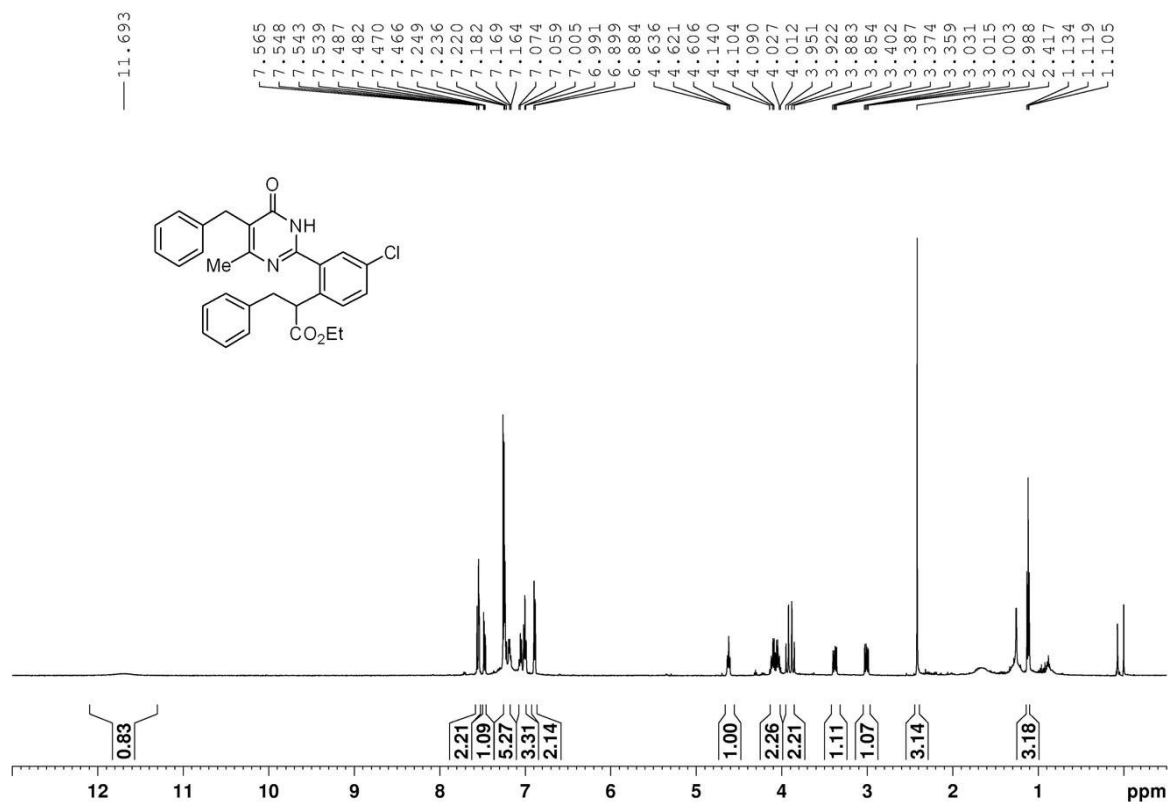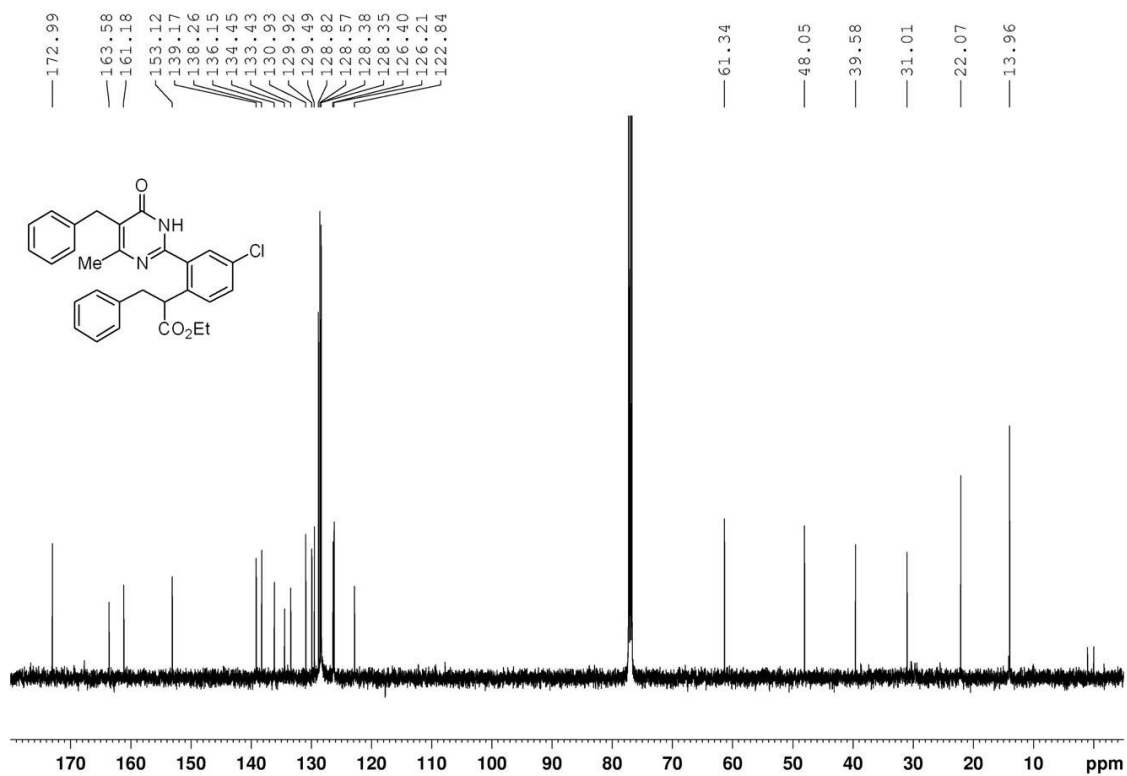

# Compound **4b**

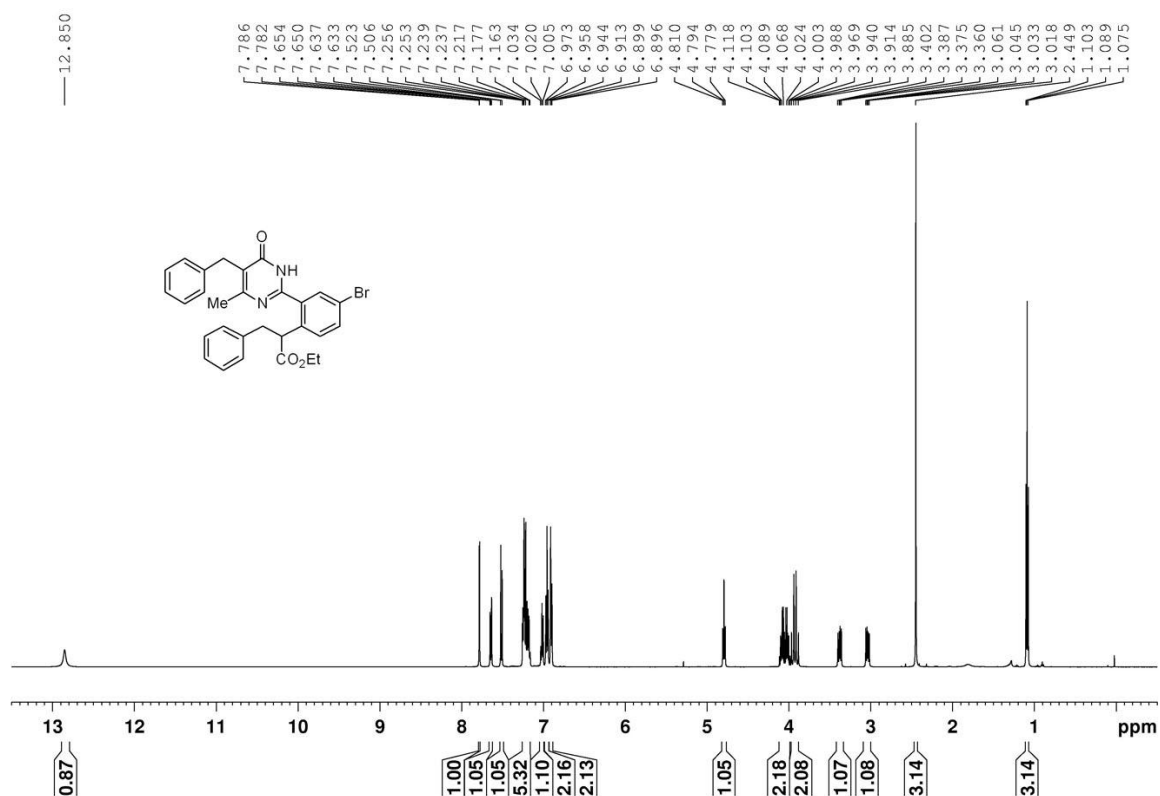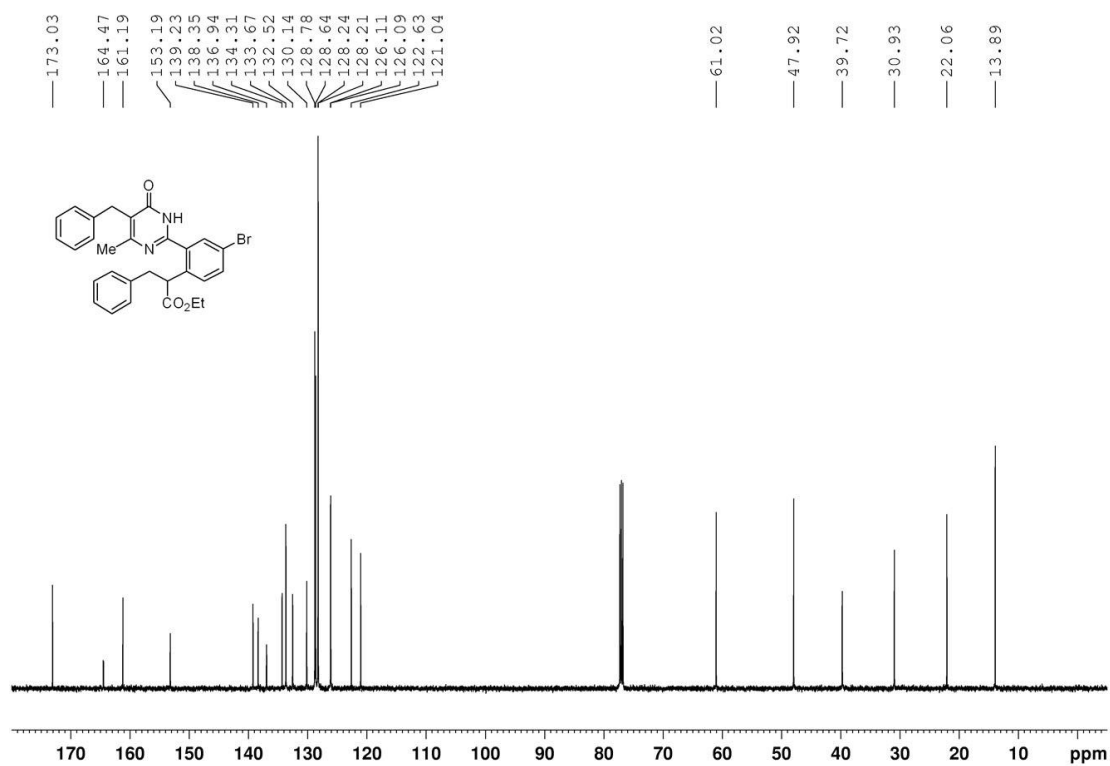

# Compound 4c

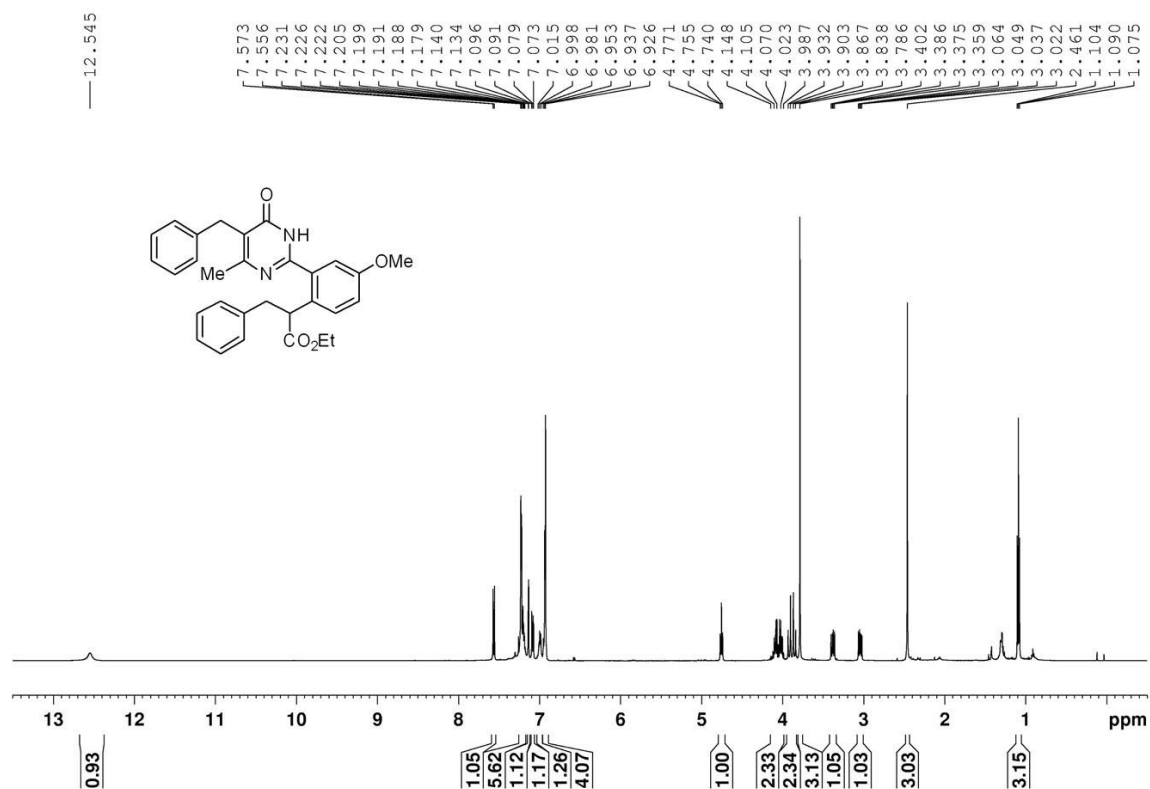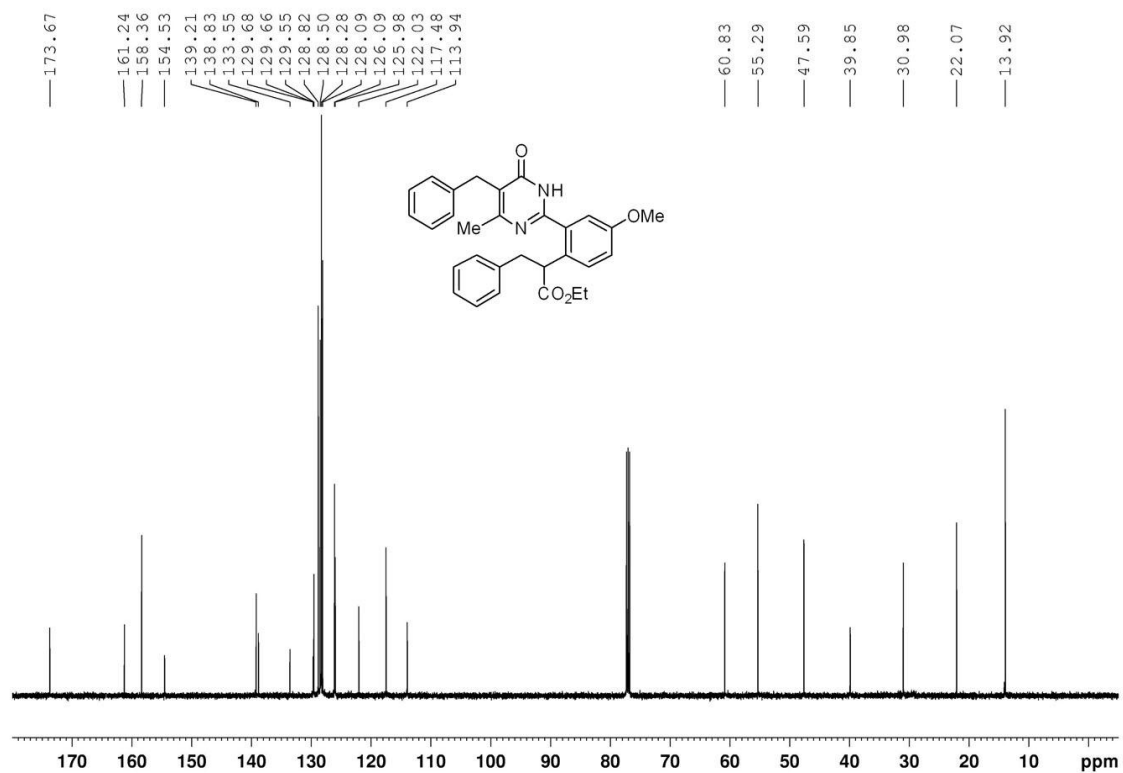

# Compound **4d**

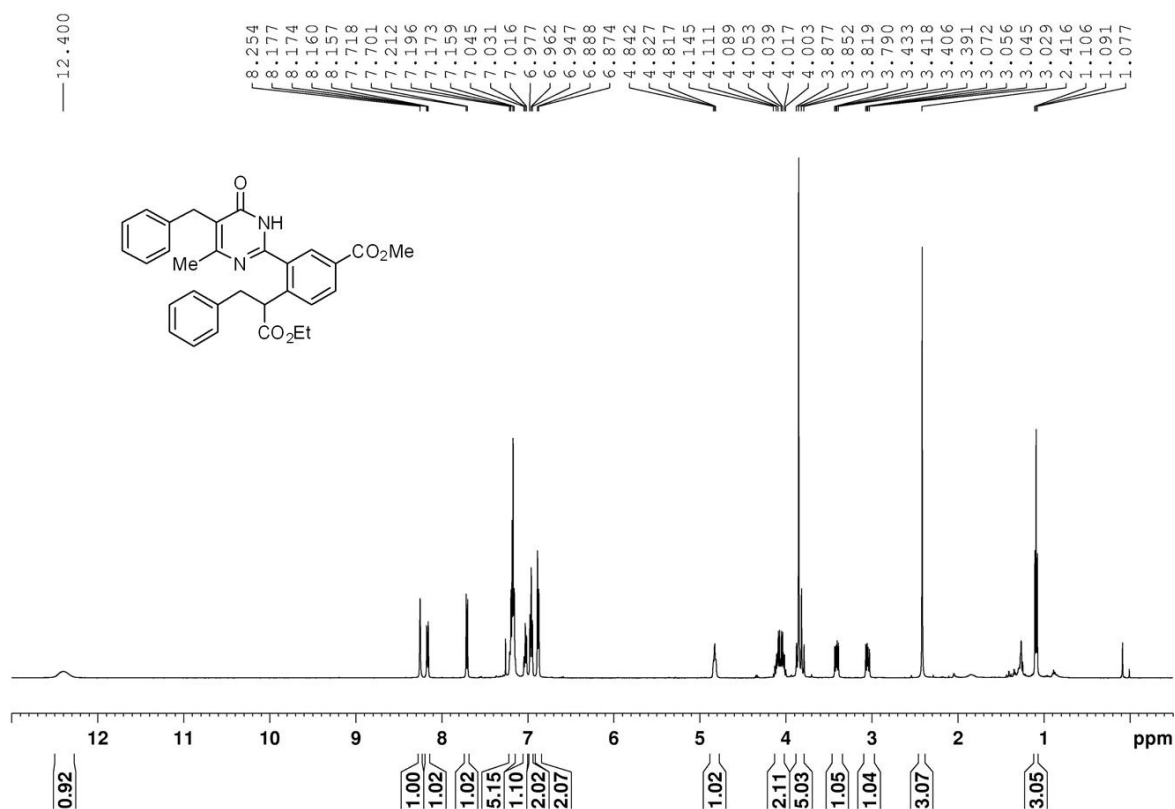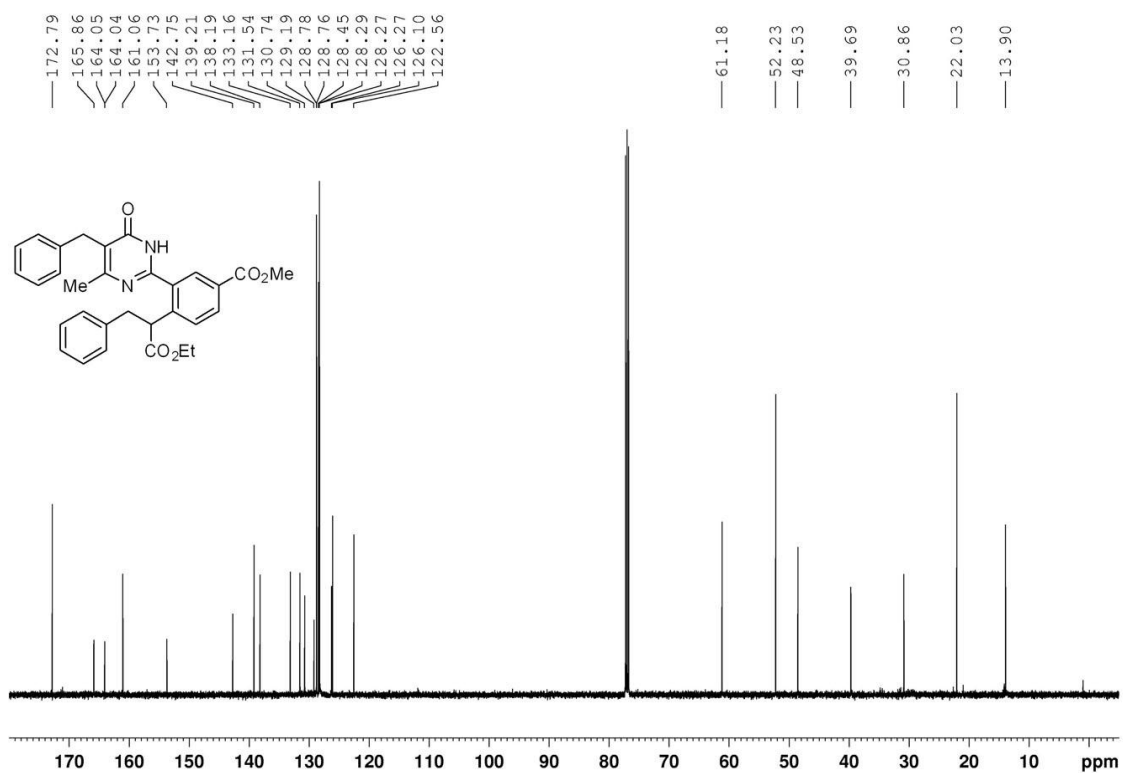

# Compound 4e

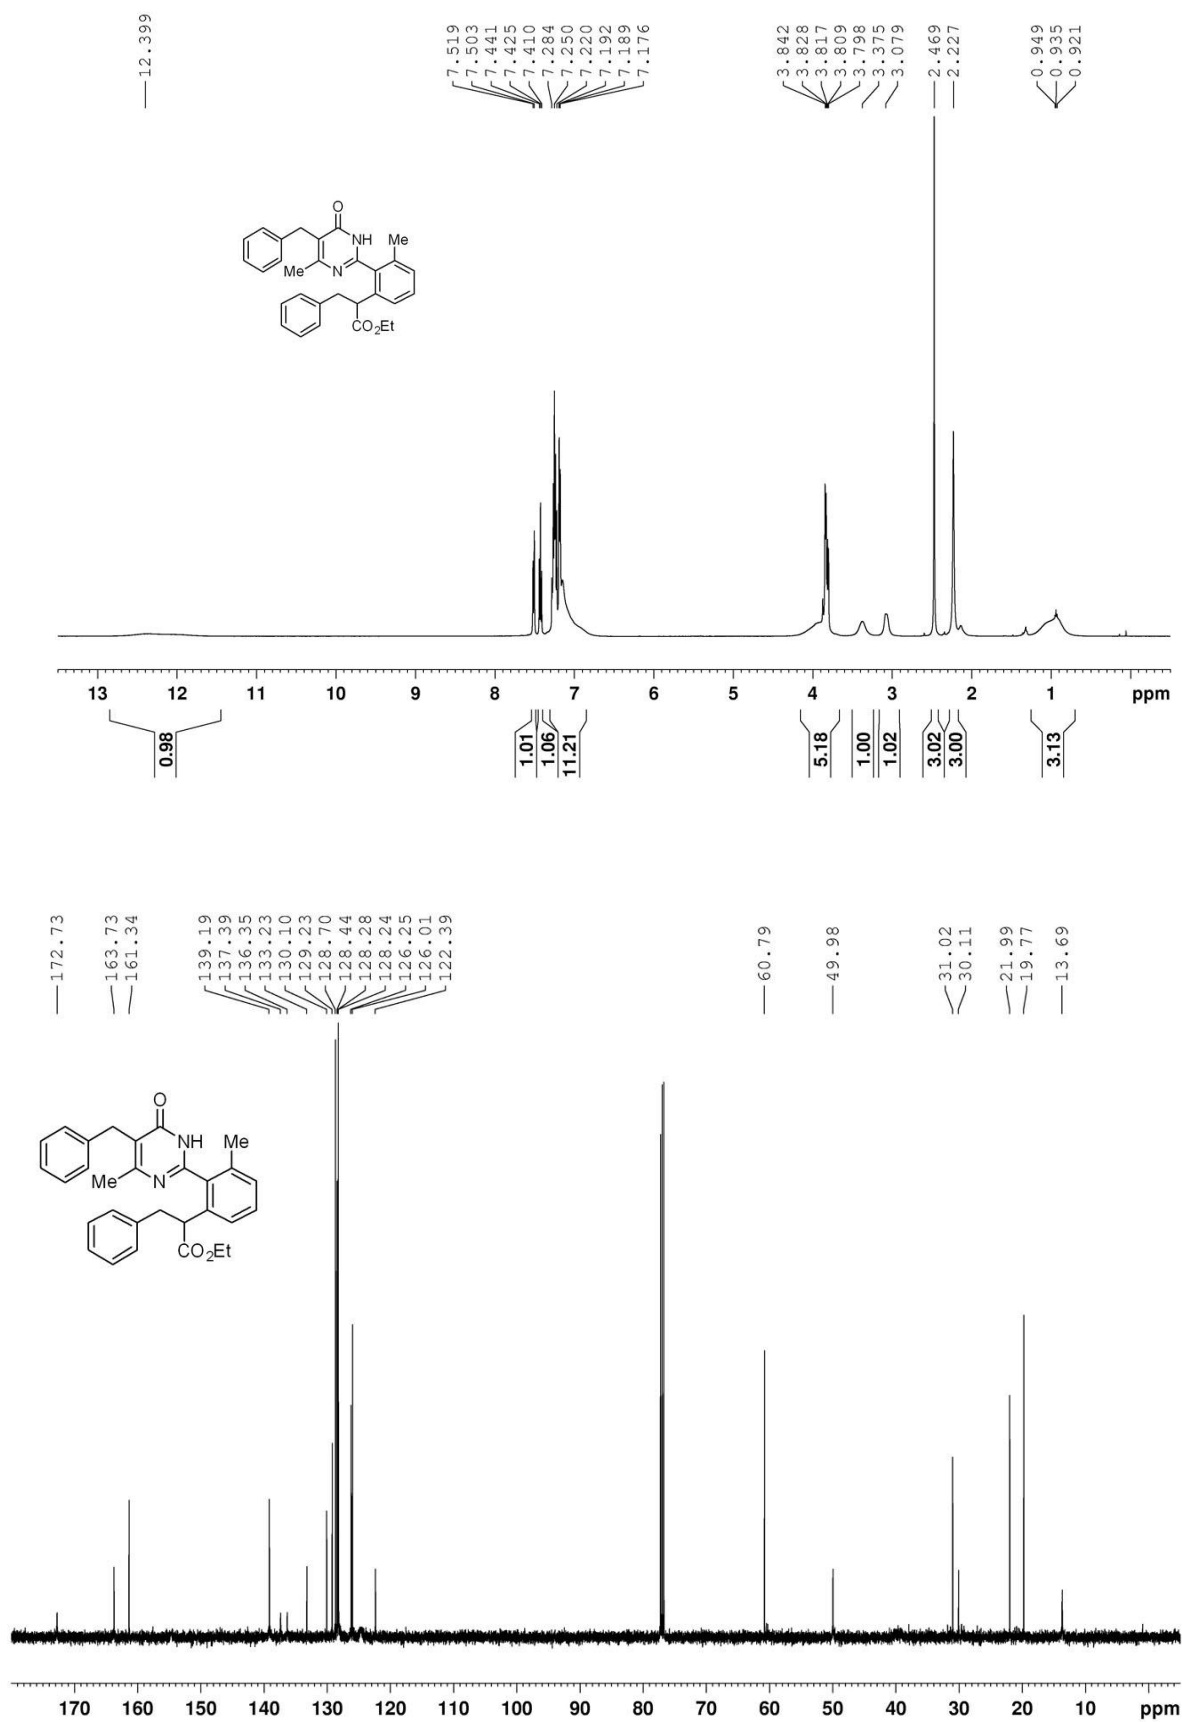



# Compound 4f

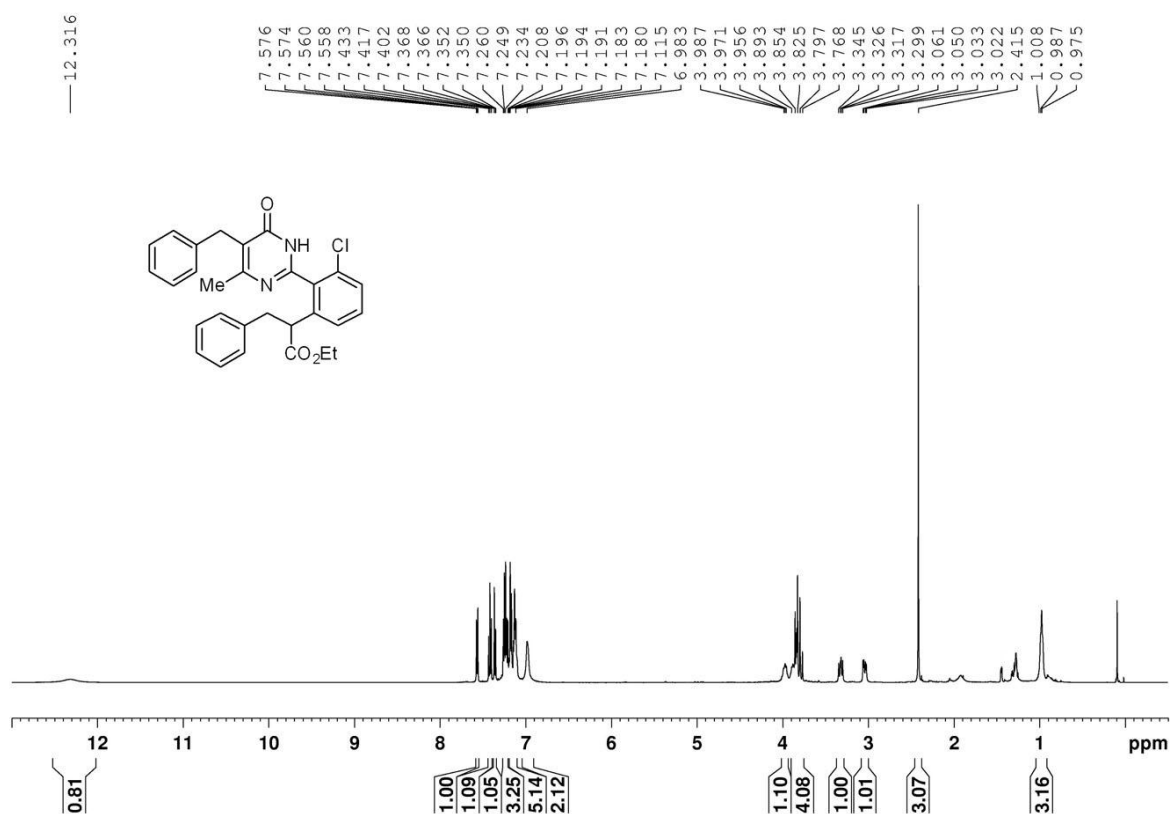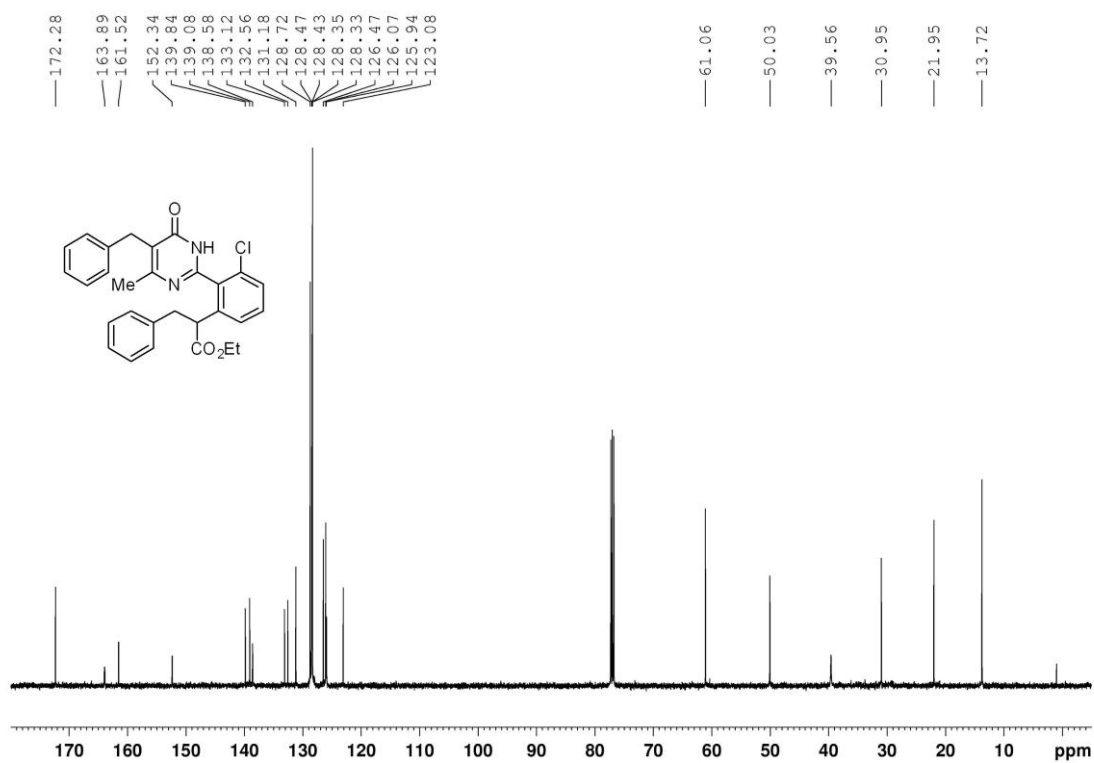

# Compound 4g

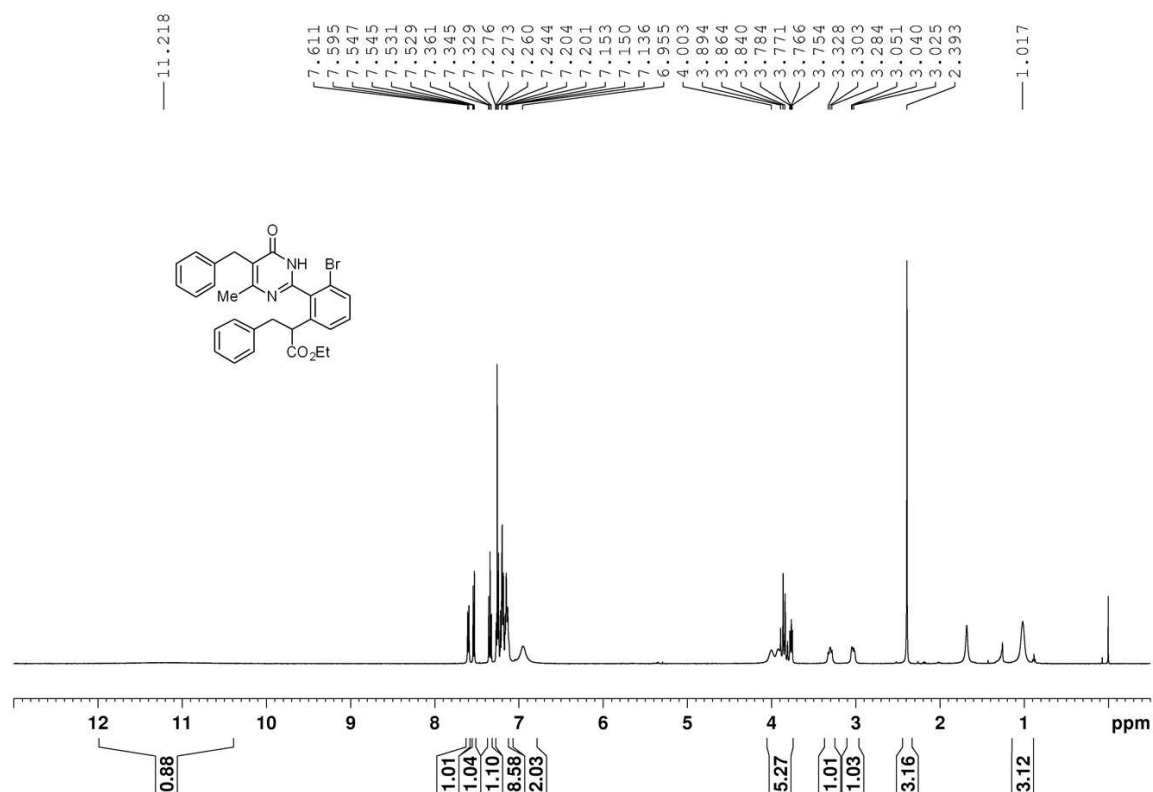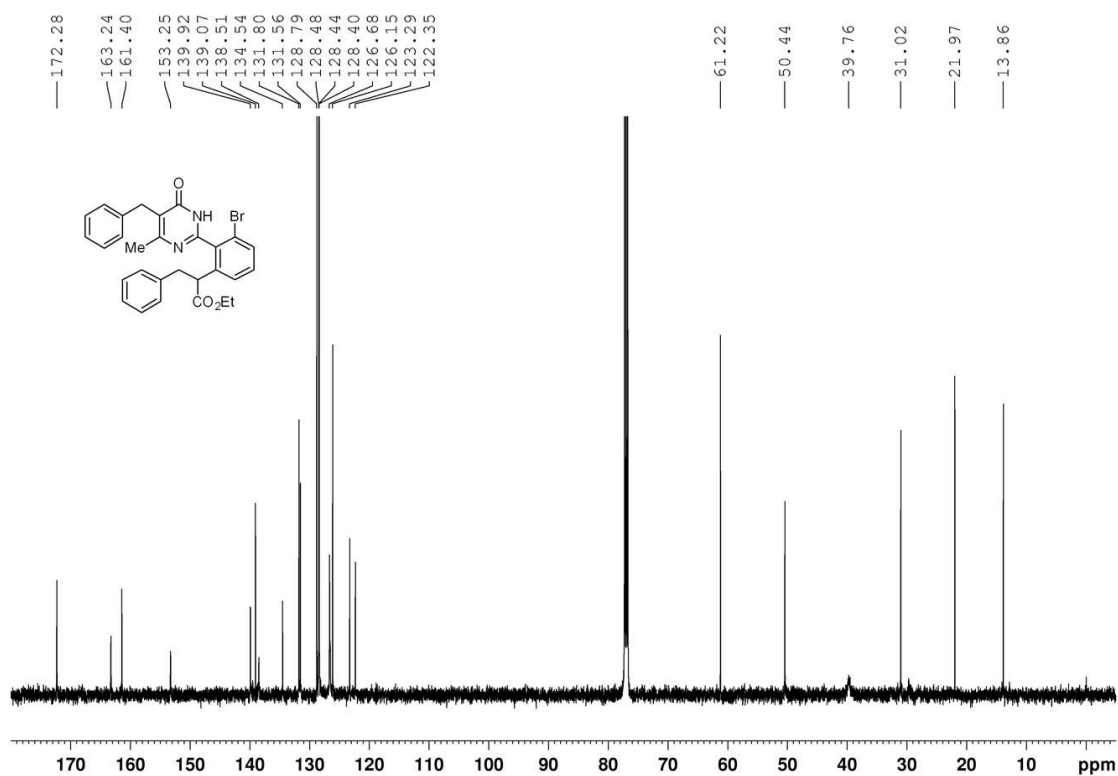

# Compound 4h

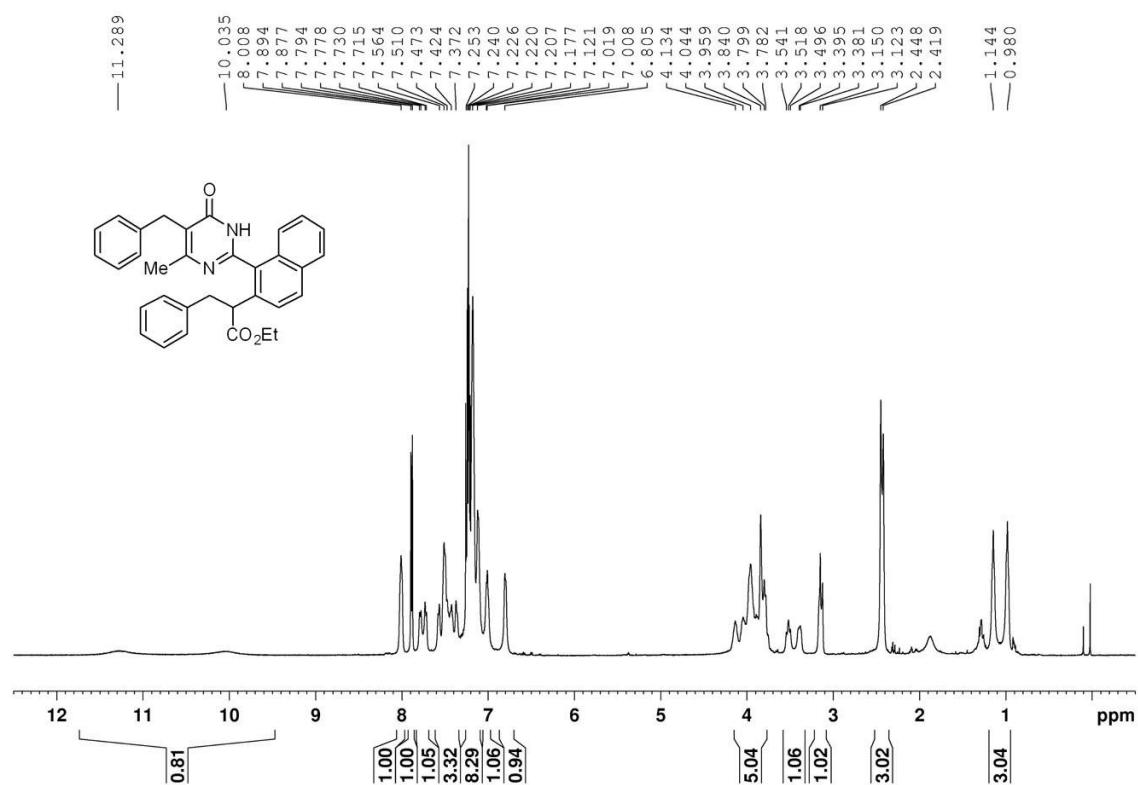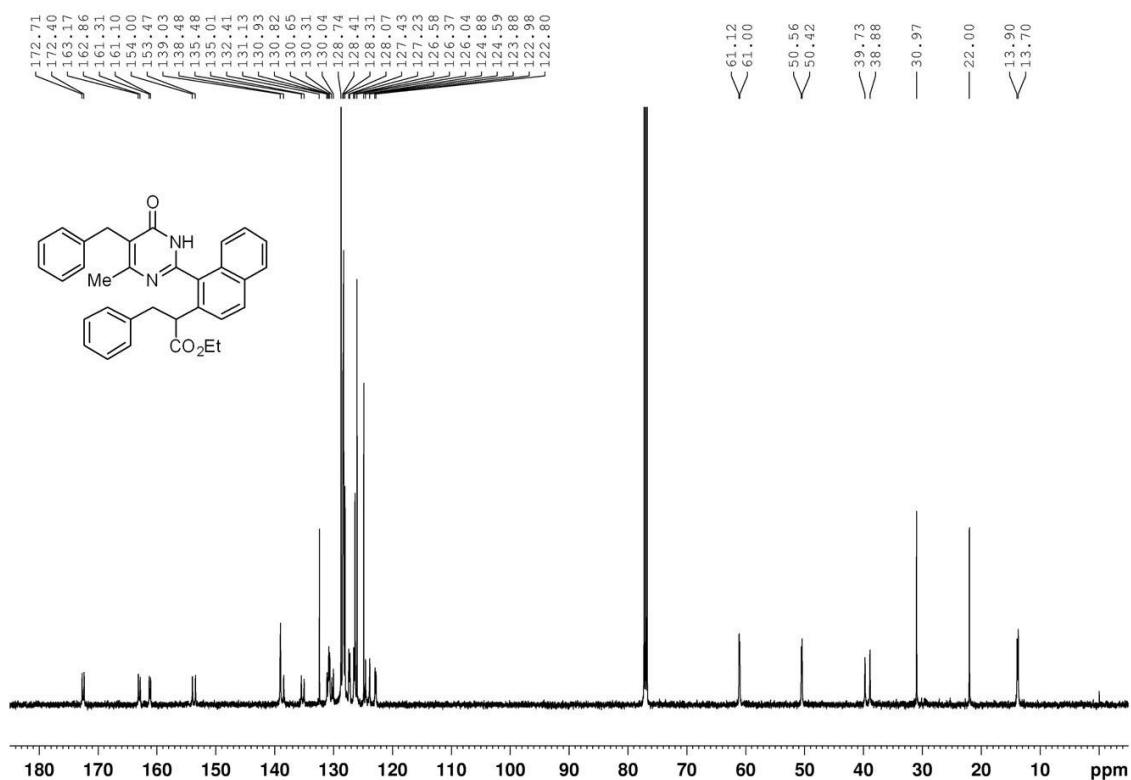

# Compound 5

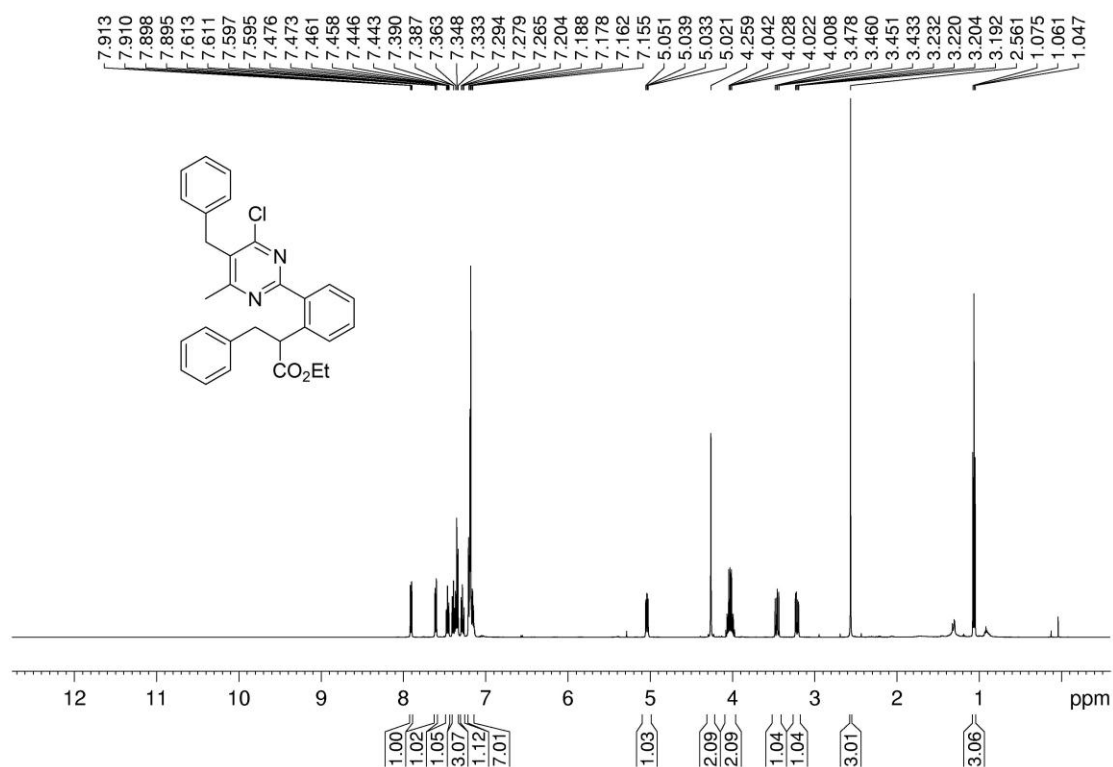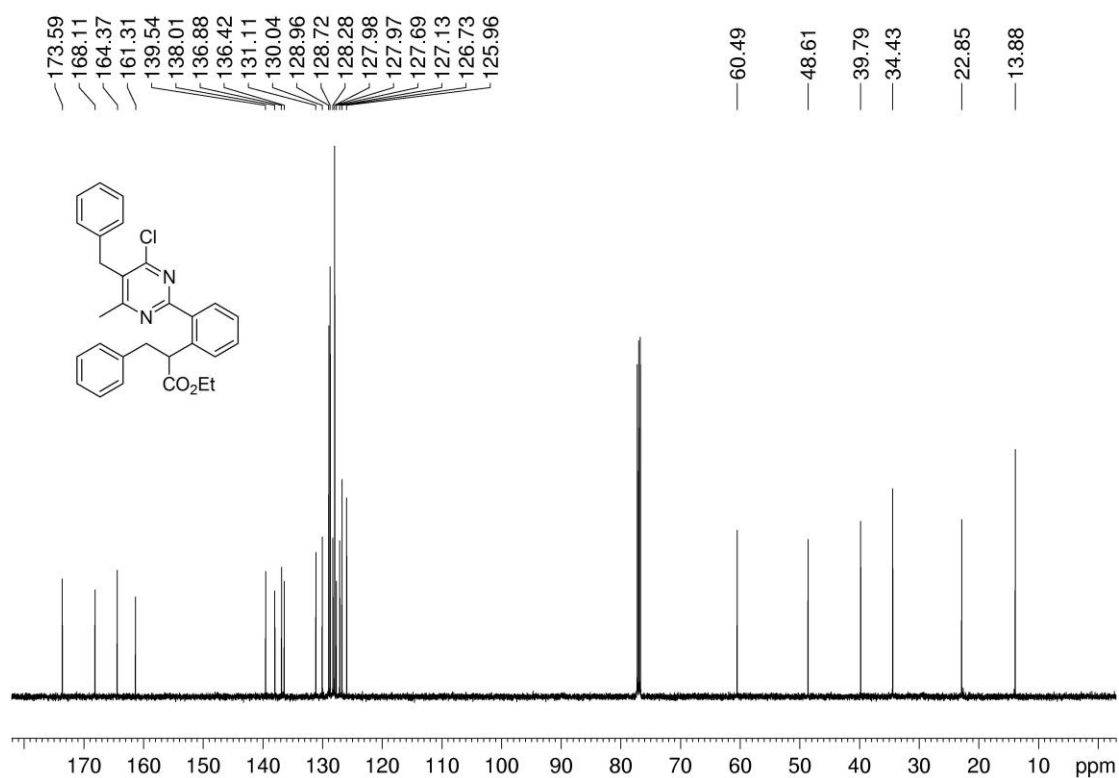

# Compound 6

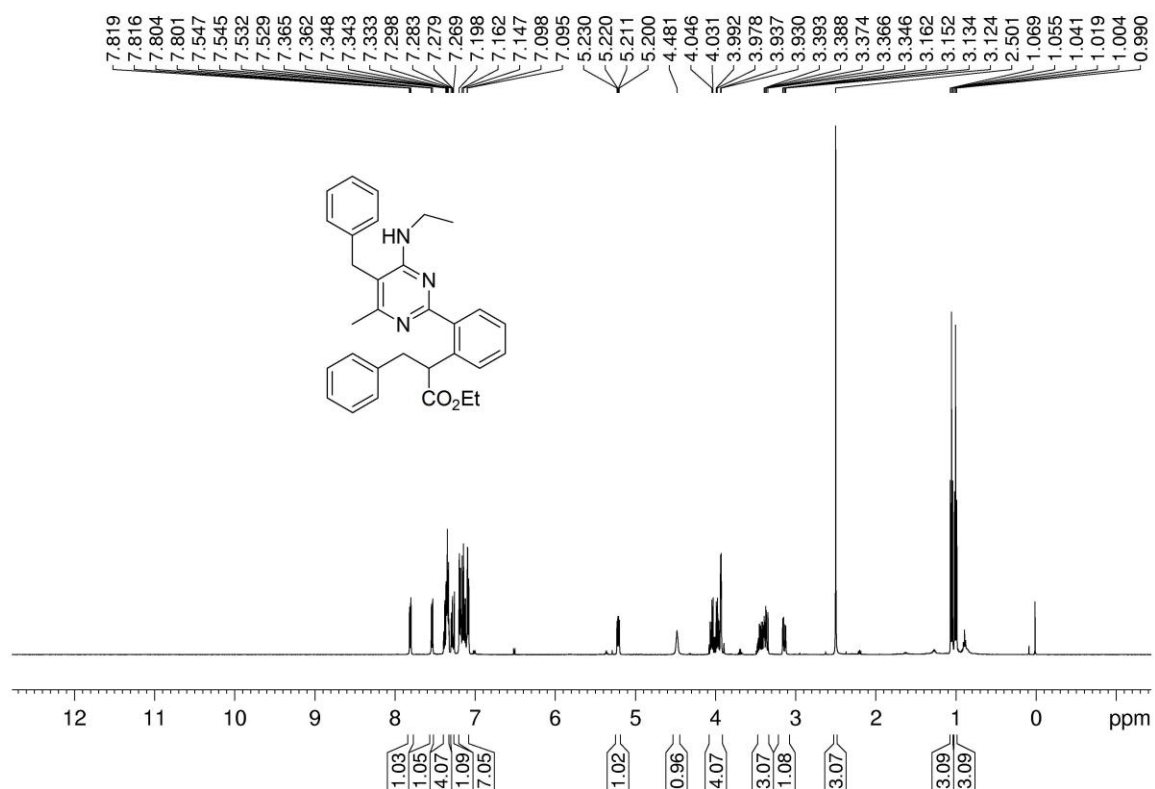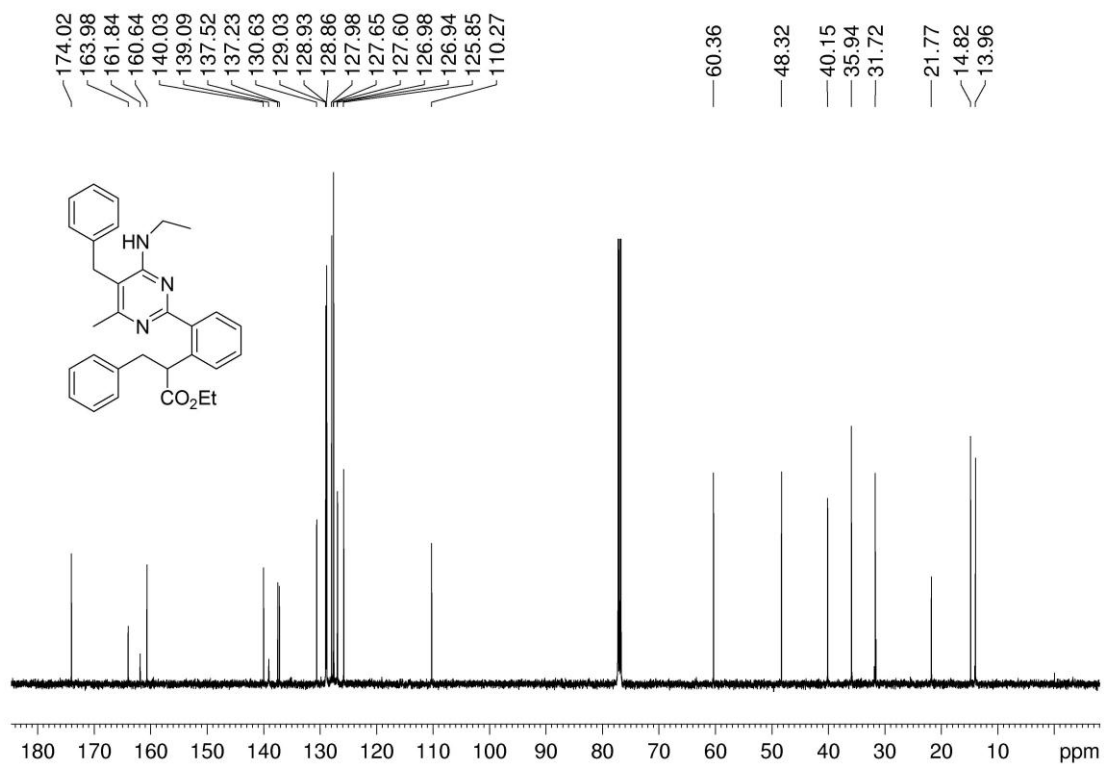

Supplement: c8cc08946a1.pdf [file c8cc08946a1.pdf]
